# Supplementary material for: Identification of QTL Associated with Regrowth Vigor Using the Nested Association Mapping Population in Switchgrass
Source: MDPI journal article supplement (doi:10.3390/plants11040566), 2022-02-21

**Figure S2. Quantitative trait loci (QTL) associated with regrowth vigor identified by Composite Interval Mapping (CIM) using the Nested Association Mapping (NAM) population.**

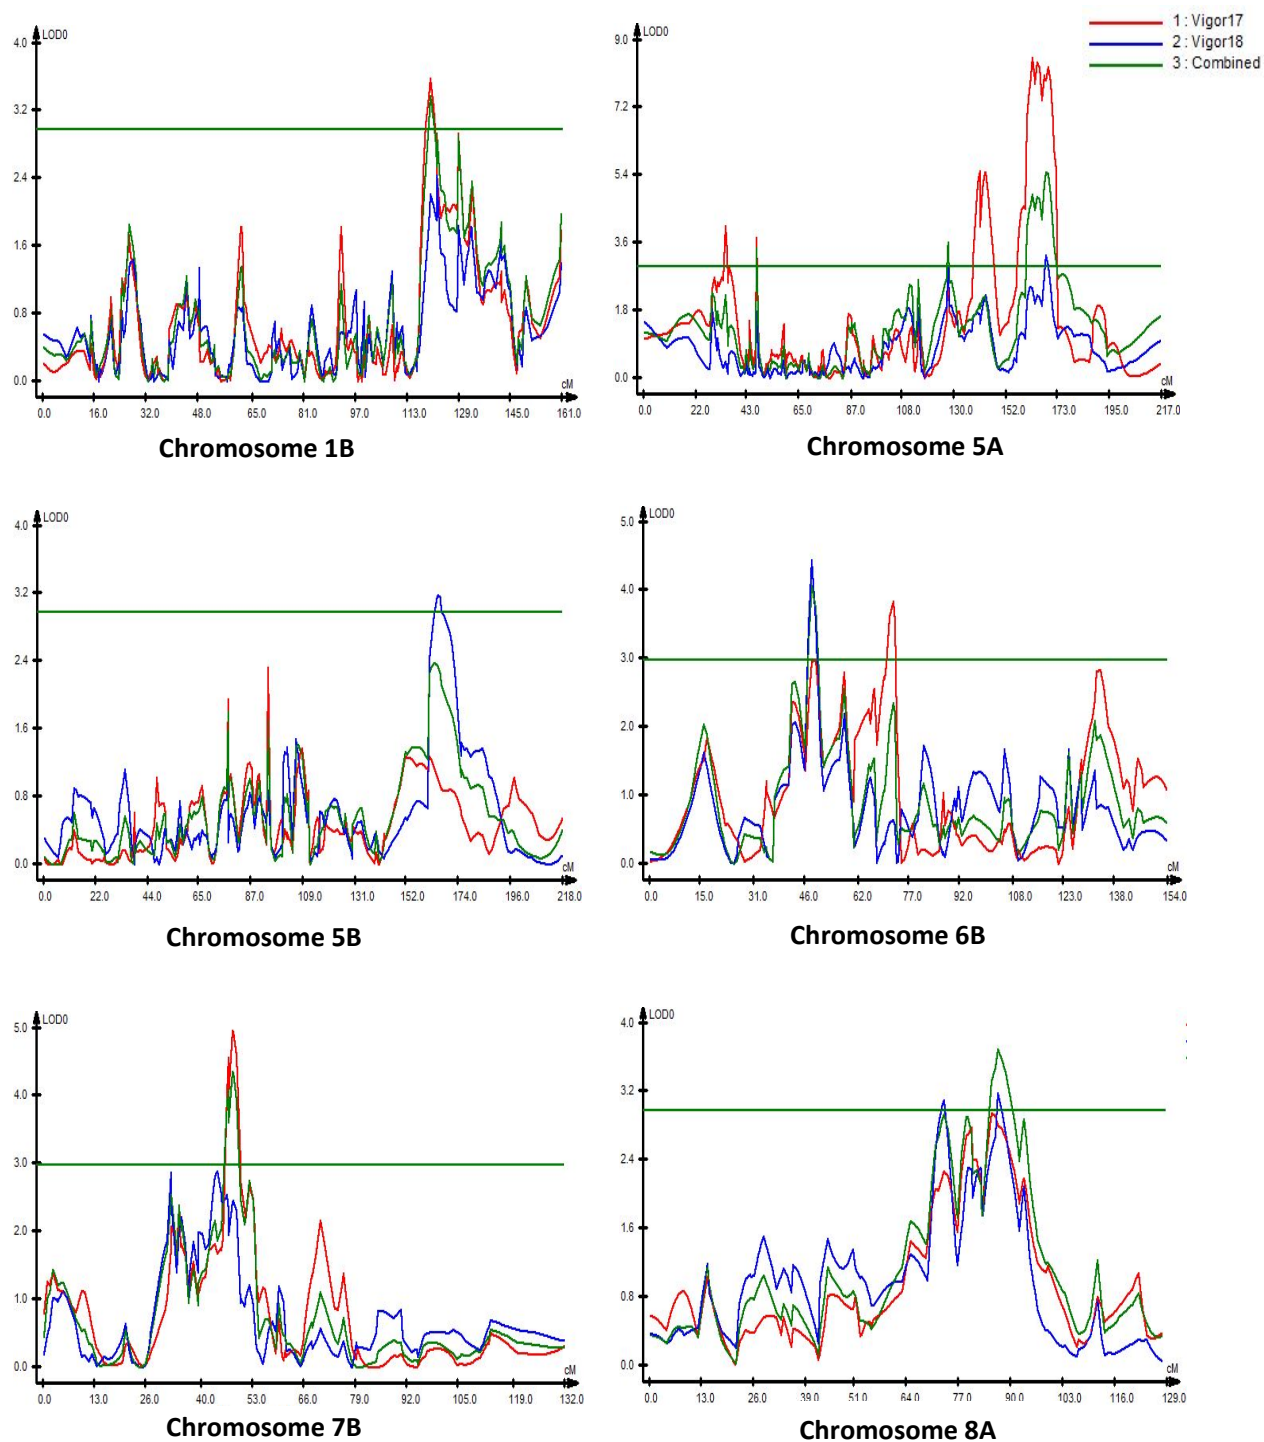

Supplement: s1 [file s1]
