# Supplementary material for: Identification of QTL Associated with Regrowth Vigor Using the Nested Association Mapping Population in Switchgrass
Source: Plants (Basel). 2022 Feb 21;11(4):566. doi: 10.3390/plants11040566 (PMC8874488; doi:10.3390/plants11040566)
Supplement: Supplementary file 1 [file plants-11-00566-s001.zip]

Archive with 5 entries (5 files):
- Figure S1.pdf
- Figure S2_QTL.pdf
- Table S1_Regrowth vigor mean data of individual families of the NAM population.xlsx
- Table S2_SNP Positions.xlsx
- Table S3_Localization of candidate genes using v5.1 reference map.xlsx
