# Supplementary material for: Identification of QTL Associated with Regrowth Vigor Using the Nested Association Mapping Population in Switchgrass
Source: Plants (Basel). 2022 Feb 21;11(4):566. doi: 10.3390/plants11040566 (PMC8874488; doi:10.3390/plants11040566)
Supplement: Supplementary file 1 [file plants-11-00566-s001.zip › Table S1_Regrowth vigor mean data of individual families of the NAM population.xlsx]

## Sheet: Regrowth vigor mean 
Table S1. Summary statistics for regrowth vigor score (The range of the score is from 0 to 9; 0=no regrowth, 1=the least vigourous, 9=the most vigorous) of the NAM families, Alamo check, AP13 and founder parents.
Cross/Genotype	Description	2017		2018		Combined (2017 and 2018)
		Mean	Std Dev	Mean	Std Dev	Mean	Std Dev
AP13 x PI414065	NAM Family - 03	2.94	0.885163	2.08667	0.970418	2.51333	0.868843
AP13 x PI442535	NAM Family - 04	1.8525	0.941502	1.285	0.976495	1.56875	0.886079
AP13 x PI421521-1	NAM Family - 05	3.19333	1.0164	1.92667	0.925222	2.56	0.868791
AP13 x PI421521-2	NAM Family - 06	3.1925	1.15144	1.97	0.961103	2.58125	0.948729
AP13 x PI315725	NAM Family - 08	2.92	0.9006	2.18667	0.957803	2.55333	0.844591
AP13 x PI315723-1	NAM Family - 09	2.9325	1.16122	1.845	1.19924	2.38875	1.09381
AP13 x PI315723-2	NAM Family - 10	2.7925	1.14444	1.83	1.1588	2.31125	1.07668
AP13 x PI315723-3	NAM Family - 11	2.99	1.13527	1.925	1.0047	2.4575	0.978445
AP13 x PI422006	NAM Family - 16	3.24	1.07288	2.3	1.13006	2.77	1.01322
AP13 x EG 1101-1	NAM Family - 17	2.99333	1.2261	2.38667	1.21526	2.69	1.12994
AP13 x EG 1101-2	NAM Family - 18	3.00667	1.11347	2.24	1.20349	2.62333	1.10004
AP13 x EG 1102-1	NAM Family - 19	2.72667	1.03092	1.97333	1.10556	2.35	0.995768
AP13 x EG 1102-2	NAM Family - 20	3.265	0.97701	2.39	1.10976	2.8275	0.970154
AP13 x EG 1104-1	NAM Family - 21	3.4325	1.1558	2.3625	1.08547	2.8975	1.0515
AP13 x EG 1104-2	NAM Family - 22	2.72	0.994036	2.02	1.13137	2.37	1.01122
Alamo	Check	6.1	0.41833	4.2	1.25499	5.15	0.65192
AP13	Recurrent Parent	2.86667	1.10589	2.11667	1.11172	2.49167	1.04734
PI414065	Founder Parent - 03	3.16667	1.1547	3	1	3.08333	1.04083
PI442535	Founder Parent - 04	2	1.5	1.66667	1.25831	1.83333	1.37689
PI421521-1	Founder Parent - 05	3.66667	1.25831	3.16667	1.04083	3.41667	1.12731
PI421521-2	Founder Parent - 06	3.33333	0.57735	2	0	2.66667	0.288675
PI315725	Founder Parent - 08	3.83333	0.288675	2.83333	1.04083	3.33333	0.629153
PI315723-1	Founder Parent - 09	2.16667	1.89297	1.66667	1.52753	1.91667	1.70171
PI315723-2	Founder Parent - 10	4.83333	2.08167	3.83333	1.52753	4.33333	1.75594
PI315723-3	Founder Parent - 11	4	0.5	2.5	0.866025	3.25	0.661438
PI422006	Founder Parent - 16	5.33333	0.763763	4.5	1.32288	4.91667	0.946485
EG 1101-1	Founder Parent - 17	3.16667	0.288675	3.16667	3.05505	3.16667	1.42156
EG 1101-2	Founder Parent - 18	5	1.73205	3.5	2.17945	4.25	1.95256
EG 1102-1	Founder Parent - 19	3.83333	0.288675	2.66667	0.763763	3.25	0.433013
EG 1102-2	Founder Parent - 20	5.33333	1.04083	5.33333	0.57735	5.33333	0.803638
EG 1104-1	Founder Parent - 21	5.66667	1.44338	5	1.32288	5.33333	1.37689
EG 1104-2	Founder Parent - 22	5	1	4.33333	0.763763	4.66667	0.877971
