# Supplementary material for: Identification of QTL Associated with Regrowth Vigor Using the Nested Association Mapping Population in Switchgrass
Source: Plants (Basel). 2022 Feb 21;11(4):566. doi: 10.3390/plants11040566 (PMC8874488; doi:10.3390/plants11040566)
Supplement: Supplementary file 1 [file plants-11-00566-s001.zip › Table S2_SNP Positions.xlsx]

## Sheet: Genetic linkage map
Table S2. Single nucleotide polymorphism (SNP) markers and their positions on chromosome.
Locus	Chromosome	Map Position (cM)
*c1a_70351104	1A	0
*c1a_71531924	1A	9.306
*c1a_70541448	1A	12.62
*c1a_70302374	1A	17.486
*c1a_70128273	1A	23.149
*c1a_70357620	1A	23.952
*c1a_71821847	1A	24.325
*c1a_70770694	1A	24.908
*c1a_70211821	1A	26.668
*c1a_62317349	1A	27.306
*c1a_70210892	1A	27.882
*c1a_71655830	1A	30.065
*c1a_70541906	1A	30.99
*c1a_70529608	1A	30.999
*c1a_71701003	1A	31.844
*c1a_70349289	1A	33.488
*c1a_66774912	1A	33.862
*c1a_70529689	1A	34.548
*c1a_71434732	1A	34.701
*c1a_66714704	1A	35.737
*c1a_21573084	1A	36.46
*c1a_69032545	1A	37.201
*c1a_71212878	1A	38.136
*c1a_71637156	1A	38.723
*c1a_64664082	1A	42.086
*c1a_66585059	1A	42.389
*c1a_21573053	1A	42.783
*c1a_70877150	1A	43.199
*c1a_61939732	1A	45.182
*c1a_66713534	1A	46.118
*c1a_59595403	1A	46.564
*c1a_67830445	1A	47.719
*c1a_70772565	1A	48.188
*c1a_64661298	1A	50.015
*c1a_67057131	1A	52.604
*c1a_64667276	1A	52.849
*c1a_66194032	1A	53.188
*c1a_65601033	1A	53.55
*c1a_66194037	1A	54.972
*c1a_62875506	1A	56.379
*c1a_57548362	1A	57.316
*c1a_71821966	1A	57.969
*c1a_31515379	1A	58.285
*c1a_22248627	1A	59.244
*c1a_66922167	1A	59.292
*c1a_60221541	1A	59.604
*c1a_1993458	1A	59.958
*c1a_61088039	1A	60.204
*c1a_67307400	1A	60.876
*c1a_57548326	1A	61.519
*c1a_18879944	1A	61.679
*c1a_62374374	1A	63.604
*c1a_66921256	1A	64.277
*c1a_68872996	1A	64.465
*c1a_58033762	1A	65.412
*c1a_62568777	1A	65.739
*c1a_36114045	1A	66.182
*c1a_2010666	1A	67.565
*c1a_18902791	1A	68.308
*c1a_65204046	1A	68.421
*c1a_65904314	1A	68.76
*c1a_57547781	1A	68.937
*c1a_58033827	1A	69.204
*c1a_67307256	1A	69.269
*c1a_66587183	1A	70.92
*c1a_62467068	1A	71.194
*c1a_63183554	1A	72.055
*c1a_34380238	1A	73.06
*c1a_43480585	1A	73.214
*c1a_2713330	1A	73.811
*c1a_37116063	1A	73.985
*c1a_18768565	1A	74.302
*c1a_35516717	1A	75.871
*c1a_19237401	1A	76.971
*c1a_44963849	1A	77.711
*c1a_36344417	1A	78.011
*c1a_17497516	1A	78.727
*c1a_43480698	1A	79.505
*c1a_16582575	1A	80.297
*c1a_68507110	1A	80.909
*c1a_47854192	1A	81.491
*c1a_16582794	1A	81.676
*c1a_59336854	1A	82.749
*c1a_17497704	1A	82.946
*c1a_57338756	1A	83.361
*c1a_57106078	1A	83.425
*c1a_66617576	1A	83.523
*c1a_18794504	1A	84.15
*c1a_59336858	1A	84.357
*c1a_44981645	1A	84.521
*c1a_22413080	1A	84.873
*c1a_18380465	1A	85.312
*c1a_218703	1A	85.888
*c1a_622559	1A	86.113
*c1a_36344037	1A	86.434
*c1a_20154541	1A	88.851
*c1a_57108265	1A	89
*c1a_62569892	1A	89.345
*c1a_21853813	1A	90.254
*c1a_707963	1A	91.678
*c1a_20382293	1A	92.136
*c1a_33538135	1A	92.518
*c1a_20154313	1A	93.69
*c1a_57791535	1A	94.475
*c1a_852616	1A	95.051
*c1a_28561250	1A	95.383
*c1a_27184159	1A	97.594
*c1a_212978	1A	98.903
*c1a_20153353	1A	99.552
*c1a_20774145	1A	100.354
*c1a_18902195	1A	100.538
*c1a_8824487	1A	101.313
*c1a_19110607	1A	101.473
*c1a_21856068	1A	102.325
*c1a_44435502	1A	102.45
*c1a_20575714	1A	102.495
*c1a_2464694	1A	103.963
*c1a_22529685	1A	105.768
*c1a_20361949	1A	106.415
*c1a_18201089	1A	106.547
*c1a_43808876	1A	108.699
*c1a_2998534	1A	109.483
*c1a_31760439	1A	112.048
*c1a_19750222	1A	112.06
*c1a_18199886	1A	113.315
*c1a_16156866	1A	113.58
*c1a_7625705	1A	114.323
*c1a_8191123	1A	117.368
*c1a_7621867	1A	119.273
*c1a_16540781	1A	120.056
*c1a_13447211	1A	120.832
*c1a_8149016	1A	123.66
*c1a_12515518	1A	124.167
*c1a_10181322	1A	126.73
*c1a_31500122	1A	127.032
*c1a_12545514	1A	127.155
*c1a_14410835	1A	131.128
*c1a_10385653	1A	133.08
*c1a_8503239	1A	133.135
*c1a_15556390	1A	133.251
*c1a_11924049	1A	133.304
*c1a_15549050	1A	136.877
*c1a_12278593	1A	140.188
*c1a_15549870	1A	140.476
*c1a_11975476	1A	140.549
*c1a_10385577	1A	141.557
*c1a_5658580	1A	145.582
*c1a_15550405	1A	146.977
*c1a_5828382	1A	150.478
*c1a_6267073	1A	151.826
*c1a_3292692	1A	157.241
*c1a_7109681	1A	158.628
*c1a_3107274	1A	159.673
*c1a_3062037	1A	161.512
*c1a_2857184	1A	162.5
*c1a_2857211	1A	164.875
*c1a_2997138	1A	166.566
*c1a_16434548	1A	168.339
*c1a_3531479	1A	168.492
*c1a_2997101	1A	168.85
*c1a_686403	1A	171.5
*c1a_3107783	1A	172.961
*c1a_967769	1A	176.209
*c1a_1211673	1A	182.237
*c1a_860838	1A	184.134
*c1a_5120547	1A	185.88
*c1a_1806268	1A	190.01
*c1b_358950	1B	0
*c1b_53862506	1B	3.358
*c1b_2831557	1B	7.006
*c1b_455265	1B	7.486
*c1b_2831491	1B	10.533
*c1b_53862211	1B	11.584
*c1b_486729	1B	12.77
*c1b_1928481	1B	14.58
*c1b_3889547	1B	14.653
*c1b_4130133	1B	16.362
*c1b_4524706	1B	16.578
*c1b_2832868	1B	17.169
*c1b_484862	1B	17.247
*c1b_2691794	1B	17.752
*c1b_21815275	1B	18.217
*c1b_1888492	1B	19.347
*c1b_484747	1B	20.914
*c1b_4130217	1B	20.934
*c1b_4253546	1B	21.786
*c1b_1796084	1B	22.375
*c1b_4473656	1B	23.441
*c1b_2400123	1B	23.562
*c1b_4131621	1B	24.318
*c1b_4374592	1B	24.835
*c1b_482158	1B	24.887
*c1b_4278885	1B	25.234
*c1b_4251354	1B	26.472
*c1b_18009955	1B	26.796
*c1b_4131526	1B	28.823
*c1b_4406810	1B	28.965
*c1b_4142479	1B	28.982
*c1b_4126078	1B	30.157
*c1b_3692080	1B	30.612
*c1b_3787585	1B	31.568
*c1b_3008913	1B	33.581
*c1b_8932392	1B	33.734
*c1b_5123949	1B	34.158
*c1b_5325348	1B	35.156
*c1b_34695451	1B	35.406
*c1b_2832247	1B	36.006
*c1b_5325155	1B	37.504
*c1b_4668687	1B	38.6
*c1b_8932472	1B	38.658
*c1b_7208270	1B	38.943
*c1b_13696644	1B	40.077
*c1b_2836292	1B	41.953
*c1b_9194642	1B	43.389
*c1b_8118725	1B	44.47
*c1b_19615943	1B	45.457
*c1b_8932870	1B	45.465
*c1b_8289985	1B	46.405
*c1b_1005294	1B	47.172
*c1b_17148486	1B	48.337
*c1b_593061	1B	48.374
*c1b_9182379	1B	48.407
*c1b_8290479	1B	48.507
*c1b_8253483	1B	50.765
*c1b_8284480	1B	51.892
*c1b_720529	1B	52.424
*c1b_16678542	1B	53.085
*c1b_9252988	1B	53.369
*c1b_3033764	1B	54.227
*c1b_9253019	1B	55.086
*c1b_8769232	1B	56.699
*c1b_8290051	1B	57.02
*c1b_9660118	1B	57.528
*c1b_586690	1B	57.968
*c1b_30274254	1B	57.993
*c1b_13707076	1B	59.168
*c1b_13550490	1B	59.395
*c1b_34108943	1B	60.062
*c1b_13500715	1B	60.091
*c1b_17941782	1B	61.358
*c1b_19575900	1B	61.702
*c1b_667472	1B	62.209
*c1b_17148804	1B	62.875
*c1b_34271081	1B	63.161
*c1b_17148864	1B	64.798
*c1b_13235540	1B	65.954
*c1b_17148735	1B	66.081
*c1b_16924428	1B	66.086
*c1b_17148089	1B	67.434
*c1b_27759610	1B	67.983
*c1b_39359200	1B	68.374
*c1b_16580947	1B	69.83
*c1b_34437053	1B	69.911
*c1b_49693592	1B	70.83
*c1b_26099175	1B	70.887
*c1b_19613024	1B	71.785
*c1b_21404151	1B	71.824
*c1b_34821925	1B	72.134
*c1b_26062644	1B	73.036
*c1b_18631889	1B	73.683
*c1b_36689687	1B	74.049
*c1b_34704097	1B	75.137
*c1b_39536631	1B	76.261
*c1b_40710725	1B	76.887
*c1b_36652275	1B	78.624
*c1b_39782183	1B	79.497
*c1b_35362119	1B	80.031
*c1b_44528725	1B	80.242
*c1b_49384451	1B	80.937
*c1b_37369678	1B	81.074
*c1b_40354722	1B	82.131
*c1b_35361873	1B	82.432
*c1b_37505948	1B	83.204
*c1b_42814051	1B	83.851
*c1b_35362133	1B	84.547
*c1b_40710529	1B	86.355
*c1b_37118444	1B	86.898
*c1b_40354357	1B	86.986
*c1b_42524008	1B	87.048
*c1b_40354814	1B	88.873
*c1b_39965549	1B	88.894
*c1b_39965666	1B	90.472
*c1b_40348597	1B	90.546
*c1b_39587840	1B	91.108
*c1b_42374802	1B	91.731
*c1b_42721309	1B	92.389
*c1b_42375679	1B	93.953
*c1b_37589464	1B	94.623
*c1b_45063177	1B	95.33
*c1b_42986734	1B	97.027
*c1b_54863868	1B	97.15
*c1b_50547949	1B	97.524
*c1b_45652352	1B	98.445
*c1b_48563582	1B	98.528
*c1b_42375049	1B	98.65
*c1b_42990658	1B	99.402
*c1b_35545051	1B	99.766
*c1b_39411049	1B	100.742
*c1b_21031138	1B	100.911
*c1b_53713017	1B	101.999
*c1b_39572335	1B	102.237
*c1b_48759577	1B	103.344
*c1b_49183590	1B	103.346
*c1b_38505040	1B	105.068
*c1b_46610290	1B	105.231
*c1b_45003916	1B	108.139
*c1b_35471286	1B	108.955
*c1b_49362680	1B	109.534
*c1b_54747998	1B	109.752
*c1b_52650271	1B	110.789
*c1b_52318543	1B	111.356
*c1b_4395529	1B	112.117
*c1b_44784203	1B	112.248
*c1b_42462928	1B	112.574
*c1b_50567950	1B	115.452
*c1b_53076037	1B	115.642
*c1b_49427020	1B	115.686
*c1b_55143181	1B	115.941
*c1b_53524682	1B	116.569
*c1b_53555272	1B	116.642
*c1b_46860086	1B	116.798
*c1b_49015261	1B	118.521
*c1b_52114747	1B	119.423
*c1b_53443735	1B	120.009
*c1b_52115015	1B	121.8
*c1b_52266443	1B	121.936
*c1b_51940471	1B	122.018
*c1b_52458778	1B	123.13
*c1b_51672509	1B	124.354
*c1b_52509338	1B	124.935
*c1b_51795847	1B	125.288
*c1b_52386229	1B	125.806
*c1b_51619419	1B	127.408
*c1b_51556254	1B	128.197
*c1b_51693384	1B	128.335
*c1b_48659770	1B	128.349
*c1b_54664994	1B	128.595
*c1b_53816221	1B	130.326
*c1b_54431597	1B	131.481
*c1b_54844642	1B	132.826
*c1b_53523477	1B	132.924
*c1b_54820765	1B	134.355
*c1b_54534857	1B	135.627
*c1b_54598087	1B	135.961
*c1b_53607053	1B	136.202
*c1b_54972112	1B	136.946
*c1b_53801546	1B	138.743
*c1b_54971702	1B	140.135
*c1b_54972723	1B	141.465
*c1b_52436684	1B	141.891
*c1b_55592041	1B	141.957
*c1b_44886743	1B	143.02
*c1b_53939832	1B	143.992
*c1b_53937059	1B	144.69
*c1b_55499266	1B	147.018
*c1b_52433642	1B	147.047
*c1b_53935194	1B	147.413
*c1b_53620730	1B	148.33
*c1b_54431307	1B	148.931
*c1b_48683682	1B	149.589
*c1b_52445591	1B	150.319
*c1b_53935220	1B	151.387
*c1b_55497995	1B	154.106
*c1b_55118559	1B	160.616
*c1b_54567673	1B	160.623
*c1b_55118558	1B	161.37
*c2a_24280503	2A	0
*c2a_21413101	2A	13.611
*c2a_25942931	2A	14.352
*c2a_21796162	2A	22.053
*c2a_3036100	2A	26.238
*c2a_21651769	2A	27.545
*c2a_5387239	2A	29.971
*c2a_3875405	2A	33.348
*c2a_606636	2A	33.505
*c2a_3875404	2A	34.281
*c2a_74128163	2A	34.46
*c2a_14964147	2A	34.622
*c2a_21651856	2A	34.967
*c2a_2180150	2A	37.729
*c2a_74128611	2A	41.433
*c2a_19868650	2A	41.464
*c2a_3054711	2A	41.646
*c2a_4595079	2A	43.564
*c2a_563064	2A	45.157
*c2a_1068463	2A	46.511
*c2a_6722724	2A	46.623
*c2a_3196679	2A	46.971
*c2a_73918531	2A	47.596
*c2a_8034468	2A	48.404
*c2a_1068452	2A	50.351
*c2a_1173785	2A	50.665
*c2a_1451447	2A	50.957
*c2a_695910	2A	51.444
*c2a_17800942	2A	51.446
*c2a_4762744	2A	52.733
*c2a_25509039	2A	53.702
*c2a_73915784	2A	54.139
*c2a_1286409	2A	54.706
*c2a_1068131	2A	55.384
*c2a_6733199	2A	56.36
*c2a_11706521	2A	56.94
*c2a_3906032	2A	57.28
*c2a_31280249	2A	59.523
*c2a_618959	2A	60.406
*c2a_2726549	2A	61.011
*c2a_2118680	2A	61.32
*c2a_5250896	2A	62.825
*c2a_77784353	2A	63.708
*c2a_11189898	2A	63.984
*c2a_5097478	2A	64.131
*c2a_4983838	2A	64.557
*c2a_75077469	2A	65.938
*c2a_661121	2A	67.653
*c2a_5393429	2A	67.739
*c2a_19868286	2A	69.049
*c2a_5250724	2A	70.132
*c2a_2460967	2A	70.55
*c2a_2141413	2A	70.93
*c2a_5393471	2A	71.52
*c2a_75351313	2A	72.726
*c2a_77784373	2A	72.788
*c2a_26180922	2A	72.898
*c2a_5368126	2A	75.924
*c2a_9317095	2A	76.159
*c2a_16101079	2A	77.03
*c2a_19951730	2A	77.689
*c2a_11778221	2A	77.691
*c2a_13634245	2A	79.658
*c2a_17902779	2A	79.694
*c2a_74153209	2A	79.694
*c2a_17534841	2A	80.061
*c2a_6531027	2A	81.733
*c2a_5584483	2A	81.852
*c2a_13621393	2A	81.918
*c2a_12169185	2A	82.15
*c2a_17650444	2A	83.619
*c2a_16153850	2A	84.313
*c2a_78954328	2A	84.742
*c2a_15782222	2A	85.74
*c2a_17650597	2A	85.865
*c2a_20186011	2A	87.437
*c2a_21470273	2A	87.717
*c2a_17590861	2A	88.366
*c2a_13619867	2A	88.76
*c2a_423753	2A	89.331
*c2a_17567782	2A	89.598
*c2a_11690545	2A	89.621
*c2a_11690508	2A	90.222
*c2a_16153946	2A	90.837
*c2a_79306071	2A	90.952
*c2a_13619420	2A	91.56
*c2a_70104482	2A	91.781
*c2a_79197347	2A	92.116
*c2a_5313769	2A	92.897
*c2a_15612482	2A	93.596
*c2a_15302987	2A	94.737
*c2a_17567733	2A	95.093
*c2a_21776620	2A	95.38
*c2a_25731938	2A	95.829
*c2a_17410755	2A	96.05
*c2a_15303141	2A	96.057
*c2a_57008023	2A	96.995
*c2a_15171857	2A	97.473
*c2a_40107938	2A	97.845
*c2a_69705058	2A	98.807
*c2a_26198585	2A	99.821
*c2a_77465634	2A	100.383
*c2a_13619798	2A	100.739
*c2a_15082482	2A	101.331
*c2a_17765098	2A	101.606
*c2a_20441110	2A	102.31
*c2a_20441024	2A	103.297
*c2a_17386061	2A	103.332
*c2a_17666397	2A	103.501
*c2a_5392935	2A	103.745
*c2a_20968145	2A	104.54
*c2a_16251076	2A	105.311
*c2a_25387559	2A	105.558
*c2a_40176949	2A	105.885
*c2a_18195563	2A	106.634
*c2a_21379384	2A	106.676
*c2a_17370817	2A	107.185
*c2a_20524648	2A	107.303
*c2a_15682714	2A	107.505
*c2a_75633093	2A	108.043
*c2a_56288136	2A	108.556
*c2a_59341913	2A	108.591
*c2a_22276431	2A	109.247
*c2a_57256983	2A	110.922
*c2a_77469877	2A	110.937
*c2a_21071080	2A	111.041
*c2a_23548195	2A	111.24
*c2a_20423751	2A	111.352
*c2a_20983055	2A	111.74
*c2a_8339791	2A	112.145
*c2a_47506832	2A	112.424
*c2a_26024304	2A	112.512
*c2a_75431113	2A	112.718
*c2a_17762135	2A	112.776
*c2a_23548275	2A	114.301
*c2a_75633522	2A	115.135
*c2a_37007652	2A	116.412
*c2a_11190087	2A	116.874
*c2a_78951202	2A	117.06
*c2a_8339472	2A	117.093
*c2a_29798558	2A	118.792
*c2a_24207971	2A	118.837
*c2a_34475209	2A	119.325
*c2a_75261275	2A	119.489
*c2a_23900105	2A	122.251
*c2a_57210349	2A	122.437
*c2a_6618300	2A	123.493
*c2a_57071244	2A	124.109
*c2a_41563935	2A	124.216
*c2a_46622314	2A	124.768
*c2a_24174472	2A	125.302
*c2a_11813094	2A	125.795
*c2a_75252015	2A	125.932
*c2a_77569384	2A	127.23
*c2a_47505785	2A	127.694
*c2a_29165982	2A	128.322
*c2a_57321663	2A	129.28
*c2a_46622948	2A	129.294
*c2a_78950338	2A	129.948
*c2a_46622743	2A	130.569
*c2a_41499936	2A	130.757
*c2a_75252742	2A	131.209
*c2a_66447784	2A	131.288
*c2a_4782916	2A	131.308
*c2a_59804403	2A	132.438
*c2a_42430437	2A	135.02
*c2a_75188418	2A	135.163
*c2a_66332282	2A	135.351
*c2a_29601403	2A	135.459
*c2a_618575	2A	136.867
*c2a_69966563	2A	137.441
*c2a_41711146	2A	137.693
*c2a_77673807	2A	137.9
*c2a_47506906	2A	139.246
*c2a_25566660	2A	139.264
*c2a_34190682	2A	140.048
*c2a_40178206	2A	140.417
*c2a_35527082	2A	141.392
*c2a_79416402	2A	141.428
*c2a_37582554	2A	143.064
*c2a_42784462	2A	144.429
*c2a_69695108	2A	145.467
*c2a_604879	2A	145.611
*c2a_77993010	2A	145.624
*c2a_13791205	2A	146.643
*c2a_42791335	2A	147.276
*c2a_75521126	2A	148.666
*c2a_62375434	2A	148.688
*c2a_41807416	2A	149.067
*c2a_69898181	2A	149.132
*c2a_1209378	2A	149.926
*c2a_75521174	2A	151.232
*c2a_72802083	2A	152.912
*c2a_42791655	2A	153.349
*c2a_69729178	2A	153.691
*c2a_77652148	2A	154.636
*c2a_2293485	2A	155.949
*c2a_69588311	2A	156.841
*c2a_13401279	2A	159.724
*c2a_69589855	2A	160.159
*c2a_77791674	2A	162.562
*c2a_70007873	2A	162.931
*c2a_3036261	2A	162.967
*c2a_69918605	2A	165.262
*c2a_70121654	2A	168.912
*c2a_69963031	2A	169.411
*c2a_34094570	2A	171.175
*c2a_73634306	2A	174.144
*c2a_69696006	2A	177.233
*c2a_75043372	2A	180.399
*c2a_75047306	2A	183.19
*c2a_77729236	2A	188.553
*c2a_77652078	2A	191.798
*c2a_77470461	2A	194.659
*c2a_77469178	2A	198.042
*c2a_76843098	2A	201.687
*c2a_77999515	2A	207.325
*c2b_53748188	2B	0
*c2b_61878420	2B	6.184
*c2b_70934935	2B	8.465
*c2b_56698658	2B	14.737
*c2b_62521788	2B	19.459
*c2b_70933850	2B	22.256
*c2b_64028563	2B	25.414
*c2b_69814707	2B	34.312
*c2b_73591076	2B	42.986
*c2b_69121037	2B	43.173
*c2b_74043151	2B	45.531
*c2b_65464384	2B	46.747
*c2b_73663252	2B	49.734
*c2b_72315963	2B	50.118
*c2b_69262326	2B	51.477
*c2b_74085159	2B	55.12
*c2b_72315895	2B	55.78
*c2b_74323737	2B	57.174
*c2b_74085196	2B	58.872
*c2b_73661688	2B	59.365
*c2b_59320182	2B	60.382
*c2b_72441793	2B	62.608
*c2b_73498319	2B	64.491
*c2b_73863339	2B	65.104
*c2b_72315353	2B	65.181
*c2b_73980055	2B	67.676
*c2b_70995140	2B	70.984
*c2b_72313057	2B	72.352
*c2b_72328530	2B	72.9
*c2b_74043014	2B	75.148
*c2b_71773781	2B	76.267
*c2b_72328548	2B	77.103
*c2b_70108689	2B	78.172
*c2b_71773652	2B	81.626
*c2b_70156297	2B	82.091
*c2b_70879843	2B	82.154
*c2b_59465246	2B	84.034
*c2b_70168759	2B	85.211
*c2b_69505322	2B	86.991
*c2b_69261749	2B	88.506
*c2b_71007666	2B	90.085
*c2b_38078333	2B	90.661
*c2b_69603190	2B	91.351
*c2b_69262112	2B	92.091
*c2b_61963807	2B	93.924
*c2b_56178758	2B	94.153
*c2b_69120177	2B	96.853
*c2b_63727134	2B	97.602
*c2b_66683204	2B	98.114
*c2b_17676600	2B	99.67
*c2b_63917886	2B	99.845
*c2b_67667245	2B	100.674
*c2b_62622625	2B	103.453
*c2b_63953589	2B	104.362
*c2b_70089241	2B	104.362
*c2b_59964453	2B	104.385
*c2b_65275379	2B	108.07
*c2b_60219172	2B	108.886
*c2b_57293177	2B	110.883
*c2b_51151403	2B	111.409
*c2b_65275332	2B	112.849
*c2b_60199485	2B	113.05
*c2b_59526236	2B	114.451
*c2b_62106490	2B	118.734
*c2b_57189768	2B	120.027
*c2b_56322157	2B	120.953
*c2b_58436013	2B	121.932
*c2b_65542636	2B	124.034
*c2b_56321507	2B	124.574
*c2b_56229784	2B	124.704
*c2b_1427358	2B	125.543
*c2b_54374031	2B	126.11
*c2b_54487259	2B	126.13
*c2b_58652018	2B	126.863
*c2b_73002333	2B	127.414
*c2b_56321571	2B	127.46
*c2b_54486925	2B	128.678
*c2b_1468782	2B	128.781
*c2b_2342708	2B	128.805
*c2b_59593800	2B	129.032
*c2b_54487489	2B	130.487
*c2b_41711679	2B	132.608
*c2b_4004776	2B	133.74
*c2b_55423933	2B	133.907
*c2b_72755993	2B	134.143
*c2b_54487755	2B	134.681
*c2b_70365846	2B	134.729
*c2b_41711821	2B	136.82
*c2b_53352170	2B	137.486
*c2b_72937866	2B	138.793
*c2b_4920775	2B	139.599
*c2b_24918066	2B	140.138
*c2b_4363448	2B	140.773
*c2b_54261822	2B	140.98
*c2b_54259882	2B	141.334
*c2b_60536671	2B	141.362
*c2b_1605176	2B	141.836
*c2b_72931169	2B	142.51
*c2b_41667889	2B	143.157
*c2b_47827782	2B	143.431
*c2b_4920811	2B	143.509
*c2b_59193091	2B	143.643
*c2b_62529846	2B	144.647
*c2b_46582190	2B	144.766
*c2b_62210585	2B	144.8
*c2b_22221675	2B	145.35
*c2b_73707973	2B	145.455
*c2b_43139424	2B	145.603
*c2b_402463	2B	145.769
*c2b_54328631	2B	145.93
*c2b_11650632	2B	145.975
*c2b_22221705	2B	147.21
*c2b_72915690	2B	147.587
*c2b_57393782	2B	147.588
*c2b_62146968	2B	148.142
*c2b_5631272	2B	148.72
*c2b_39831588	2B	149.928
*c2b_19689691	2B	149.982
*c2b_41763475	2B	150.095
*c2b_62137907	2B	150.273
*c2b_4293326	2B	150.913
*c2b_5131328	2B	152.024
*c2b_72932108	2B	152.901
*c2b_58728862	2B	153.038
*c2b_4384807	2B	153.605
*c2b_33152667	2B	153.845
*c2b_62137524	2B	154.367
*c2b_30121378	2B	155.274
*c2b_4375336	2B	155.56
*c2b_40396726	2B	155.745
*c2b_5630589	2B	156.069
*c2b_41813032	2B	157.543
*c2b_16064180	2B	158.664
*c2b_40395652	2B	159.054
*c2b_32150332	2B	159.265
*c2b_72937666	2B	159.495
*c2b_5685292	2B	162.016
*c2b_14759323	2B	162.048
*c2b_65678467	2B	162.123
*c2b_40396423	2B	162.313
*c2b_8303634	2B	162.614
*c2b_40987348	2B	162.946
*c2b_8315999	2B	165.942
*c2b_39752428	2B	166.63
*c2b_16065300	2B	166.856
*c2b_65463834	2B	166.875
*c2b_72937628	2B	167.928
*c2b_39744760	2B	168.614
*c2b_18217668	2B	168.881
*c2b_11934321	2B	169.927
*c2b_41523915	2B	171.593
*c2b_4385161	2B	172.138
*c2b_69971259	2B	172.621
*c2b_2348467	2B	172.993
*c2b_12095192	2B	174.212
*c2b_12428681	2B	175.092
*c2b_18267379	2B	175.914
*c2b_20612209	2B	179.976
*c2b_21851537	2B	180.056
*c2b_12094856	2B	181.319
*c2b_11803249	2B	182.228
*c2b_5563463	2B	184.799
*c2b_11941863	2B	185.241
*c2b_18275191	2B	185.297
*c2b_14679039	2B	188.006
*c2b_71900373	2B	188.326
*c2b_11996664	2B	192.157
*c2b_17273687	2B	193.946
*c2b_12699330	2B	197.608
*c2b_11996818	2B	201.159
*c2b_5547788	2B	208.069
*c3a_48037735	3A	0
*c3a_48297769	3A	17.096
*c3a_48783579	3A	19.293
*c3a_48006186	3A	19.647
*c3a_47832416	3A	28.05
*c3a_48763659	3A	28.19
*c3a_45464595	3A	29.034
*c3a_45579817	3A	30.587
*c3a_46869113	3A	32.818
*c3a_48783410	3A	34.88
*c3a_45659463	3A	36.573
*c3a_46890274	3A	37.78
*c3a_42102847	3A	40.383
*c3a_47590617	3A	40.518
*c3a_45796935	3A	41.56
*c3a_45597319	3A	45.269
*c3a_45724228	3A	45.434
*c3a_41860560	3A	47.015
*c3a_42174507	3A	49.278
*c3a_47563060	3A	50.467
*c3a_45724142	3A	53.308
*c3a_43080197	3A	55.897
*c3a_47322981	3A	58.054
*c3a_43911933	3A	59.003
*c3a_42976115	3A	60.5
*c3a_42986848	3A	61.746
*c3a_47268273	3A	61.779
*c3a_39945899	3A	64.962
*c3a_47321310	3A	65.267
*c3a_39680456	3A	66.388
*c3a_39194054	3A	69.945
*c3a_39785719	3A	70.664
*c3a_48441176	3A	71.746
*c3a_36372270	3A	72.923
*c3a_39945626	3A	74.965
*c3a_39846719	3A	77.047
*c3a_39945692	3A	79.594
*c3a_36372583	3A	80.504
*c3a_39368969	3A	81.316
*c3a_36378592	3A	84.582
*c3a_40270390	3A	86.527
*c3a_39878119	3A	86.862
*c3a_34504643	3A	91.076
*c3a_41259198	3A	91.38
*c3a_16290079	3A	92.682
*c3a_30272610	3A	96.084
*c3a_31512584	3A	96.543
*c3a_16347023	3A	100.979
*c3a_17970758	3A	101.082
*c3a_15713244	3A	102.163
*c3a_27004296	3A	102.871
*c3a_34015331	3A	103.018
*c3a_24369994	3A	107.347
*c3a_16037949	3A	111.642
*c3a_15232242	3A	112.31
*c3a_22872672	3A	112.385
*c3a_15251498	3A	113.16
*c3a_25908783	3A	114.218
*c3a_18077235	3A	114.739
*c3a_10397325	3A	116.083
*c3a_15251546	3A	116.211
*c3a_17970093	3A	116.955
*c3a_18075684	3A	117.402
*c3a_16123079	3A	120.244
*c3a_10395581	3A	120.501
*c3a_16037828	3A	121.587
*c3a_12023700	3A	121.776
*c3a_8273690	3A	123.358
*c3a_10492677	3A	125.418
*c3a_10518538	3A	125.68
*c3a_9667094	3A	127.116
*c3a_24408911	3A	127.194
*c3a_9809879	3A	128.87
*c3a_9667145	3A	131.153
*c3a_9587740	3A	133.489
*c3a_9488374	3A	134.662
*c3a_8410775	3A	136.6
*c3a_12526678	3A	138.55
*c3a_3924196	3A	138.656
*c3a_24392182	3A	139.121
*c3a_8668834	3A	139.364
*c3a_8095284	3A	140.202
*c3a_12575500	3A	140.907
*c3a_8397411	3A	141.013
*c3a_8668050	3A	141.426
*c3a_10715682	3A	141.437
*c3a_8667882	3A	143.151
*c3a_15309933	3A	143.215
*c3a_2869285	3A	144.872
*c3a_8668986	3A	145.16
*c3a_5424442	3A	145.639
*c3a_6431496	3A	146.239
*c3a_6248523	3A	149.381
*c3a_5429283	3A	150.538
*c3a_5593477	3A	153.106
*c3a_4963887	3A	153.833
*c3a_7774739	3A	154.619
*c3a_13361050	3A	156.099
*c3a_4946734	3A	156.757
*c3a_2998896	3A	157.029
*c3a_2851277	3A	157.553
*c3a_3028862	3A	157.693
*c3a_7460999	3A	158.704
*c3a_3103480	3A	159.342
*c3a_2996847	3A	163.347
*c3a_1730535	3A	163.866
*c3a_3028484	3A	165.931
*c3a_2606484	3A	167.778
*c3a_1920373	3A	168.727
*c3a_13672715	3A	169.311
*c3a_1058111	3A	170.844
*c3a_1339280	3A	170.986
*c3a_1057578	3A	172.574
*c3a_1058113	3A	173.996
*c3a_2672073	3A	174.088
*c3a_1198599	3A	178.086
*c3a_1057724	3A	179.051
*c3a_1827530	3A	179.896
*c3a_1920436	3A	185.205
*c3a_1679605	3A	194.276
*c3b_30314302	3B	0
*c3b_41637671	3B	3.056
*c3b_19815284	3B	6.393
*c3b_8040501	3B	7.911
*c3b_42155076	3B	13.812
*c3b_14167444	3B	14.019
*c3b_12165086	3B	14.112
*c3b_35242618	3B	14.277
*c3b_15971721	3B	15.59
*c3b_34844799	3B	16.687
*c3b_37736596	3B	16.778
*c3b_16020800	3B	19.046
*c3b_20994950	3B	20.581
*c3b_15972090	3B	21.342
*c3b_37736532	3B	21.992
*c3b_14169538	3B	23.067
*c3b_15973776	3B	23.307
*c3b_20994966	3B	23.579
*c3b_32313275	3B	23.693
*c3b_20831865	3B	26.257
*c3b_19320316	3B	27.466
*c3b_36511720	3B	28.009
*c3b_20271958	3B	28.315
*c3b_32749742	3B	29.335
*c3b_20831968	3B	29.676
*c3b_17806485	3B	30.78
*c3b_23964142	3B	31.647
*c3b_36229855	3B	32.336
*c3b_36511498	3B	32.931
*c3b_16023944	3B	33.512
*c3b_36798469	3B	34.504
*c3b_26736575	3B	36.337
*c3b_20273654	3B	36.949
*c3b_16122729	3B	38.012
*c3b_32750264	3B	38.355
*c3b_30360730	3B	39.796
*c3b_8435316	3B	40.064
*c3b_42152868	3B	40.087
*c3b_15777949	3B	40.102
*c3b_35204489	3B	41.675
*c3b_28793581	3B	42.045
*c3b_46071076	3B	42.932
*c3b_2095581	3B	43.165
*c3b_42779362	3B	45.602
*c3b_16366378	3B	47.282
*c3b_8041855	3B	48.175
*c3b_10150562	3B	50.561
*c3b_8436468	3B	51.076
*c3b_46075892	3B	51.25
*c3b_45244551	3B	54.129
*c3b_21733672	3B	54.457
*c3b_7319101	3B	54.483
*c3b_8040412	3B	54.585
*c3b_43443567	3B	56.721
*c3b_10150784	3B	57.012
*c3b_1300380	3B	57.727
*c3b_42936098	3B	57.864
*c3b_17624128	3B	58.032
*c3b_2097235	3B	58.568
*c3b_44443671	3B	58.707
*c3b_47068027	3B	59.814
*c3b_8042234	3B	60.442
*c3b_47206646	3B	61.557
*c3b_8919265	3B	61.828
*c3b_4405111	3B	62.898
*c3b_10151081	3B	63.058
*c3b_41620428	3B	63.922
*c3b_1308363	3B	63.933
*c3b_42843520	3B	65.301
*c3b_4606860	3B	65.732
*c3b_4379144	3B	67.195
*c3b_8353480	3B	68.246
*c3b_3625979	3B	68.511
*c3b_901777	3B	69.361
*c3b_43443406	3B	70.247
*c3b_43126519	3B	70.589
*c3b_43126528	3B	71.157
*c3b_4110842	3B	71.374
*c3b_43194308	3B	71.924
*c3b_4376235	3B	73.221
*c3b_47084965	3B	74.284
*c3b_45113739	3B	74.657
*c3b_4260613	3B	75.44
*c3b_940853	3B	76.699
*c3b_4051204	3B	77.189
*c3b_45660165	3B	77.911
*c3b_43296699	3B	78.915
*c3b_21532744	3B	78.965
*c3b_46223262	3B	79.196
*c3b_46223242	3B	80.582
*c3b_46135379	3B	81.754
*c3b_1892875	3B	82.22
*c3b_46222562	3B	83.03
*c3b_1153978	3B	83.563
*c3b_2523144	3B	84.668
*c3b_4048981	3B	84.805
*c3b_46135455	3B	85.085
*c3b_45913653	3B	85.26
*c3b_46705987	3B	85.748
*c3b_42922893	3B	87.141
*c3b_46135493	3B	87.605
*c3b_766914	3B	87.709
*c3b_46023005	3B	88.829
*c3b_2523106	3B	90.008
*c3b_45174152	3B	90.962
*c3b_4061191	3B	93.131
*c3b_47213783	3B	93.152
*c3b_47646293	3B	93.662
*c3b_45781270	3B	93.668
*c3b_45070931	3B	93.962
*c3b_948976	3B	94.289
*c3b_3944570	3B	94.455
*c3b_843202	3B	95.338
*c3b_1480626	3B	96.887
*c3b_47349046	3B	98.78
*c3b_42152097	3B	100.162
*c3b_47177958	3B	100.657
*c3b_47646321	3B	101.546
*c3b_47644589	3B	108.369
*c3b_46022673	3B	108.465
*c3b_47644360	3B	118.303
*c3b_47904050	3B	127.961
*c4a_2216864	4A	0
*c4a_2497387	4A	7.766
*c4a_2528032	4A	9.912
*c4a_1639920	4A	14.203
*c4a_1705924	4A	14.816
*c4a_2137519	4A	16.551
*c4a_1966888	4A	19.339
*c4a_1956666	4A	22.335
*c4a_5818365	4A	23.478
*c4a_1909672	4A	25.257
*c4a_1968004	4A	26.664
*c4a_7148865	4A	27.456
*c4a_1751906	4A	27.814
*c4a_2551307	4A	28.182
*c4a_4417407	4A	31.174
*c4a_7149110	4A	32.161
*c4a_4417371	4A	32.991
*c4a_5818443	4A	33.091
*c4a_4418378	4A	34.781
*c4a_4418495	4A	35.549
*c4a_4565804	4A	37.612
*c4a_5002619	4A	38.425
*c4a_5027331	4A	38.836
*c4a_5816602	4A	41.428
*c4a_7362591	4A	41.657
*c4a_9863156	4A	41.895
*c4a_6765738	4A	42.88
*c4a_7235483	4A	44.24
*c4a_9628908	4A	45.213
*c4a_2126931	4A	45.261
*c4a_6529350	4A	47.405
*c4a_8478220	4A	47.587
*c4a_16214983	4A	49.042
*c4a_8051858	4A	52.788
*c4a_8478415	4A	53.469
*c4a_12139825	4A	54.008
*c4a_21606434	4A	54.434
*c4a_38568742	4A	56.426
*c4a_10571403	4A	58.253
*c4a_33385409	4A	58.615
*c4a_14213585	4A	59.468
*c4a_2022985	4A	60.14
*c4a_8405148	4A	60.674
*c4a_21842058	4A	60.941
*c4a_33385571	4A	61.121
*c4a_41026133	4A	63.485
*c4a_41407642	4A	64.52
*c4a_31211001	4A	66.518
*c4a_38744521	4A	67.126
*c4a_5355378	4A	68.383
*c4a_8407575	4A	69.226
*c4a_32987797	4A	69.762
*c4a_38744512	4A	70.79
*c4a_21819640	4A	70.992
*c4a_35776495	4A	71.651
*c4a_30266872	4A	73.094
*c4a_21842975	4A	73.731
*c4a_33075761	4A	75.396
*c4a_21421648	4A	76.559
*c4a_27863786	4A	79.556
*c4a_33141391	4A	81.531
*c4a_18121450	4A	81.658
*c4a_46005470	4A	81.972
*c4a_22191406	4A	82.167
*c4a_21845697	4A	82.916
*c4a_21819080	4A	83.608
*c4a_22698889	4A	84.451
*c4a_45519577	4A	84.928
*c4a_24543367	4A	85.122
*c4a_32988504	4A	90.064
*c4a_47099035	4A	90.544
*c4a_29351297	4A	91.141
*c4a_44248251	4A	92.686
*c4a_42296977	4A	93.785
*c4a_49485370	4A	94.132
*c4a_14213543	4A	95.316
*c4a_45558732	4A	96.136
*c4a_22529155	4A	98.479
*c4a_44571938	4A	98.542
*c4a_45898333	4A	99.131
*c4a_45886544	4A	101.59
*c4a_22510361	4A	101.908
*c4a_45609859	4A	105.394
*c4a_37554589	4A	105.441
*c4a_45190403	4A	106.066
*c4a_49532469	4A	106.751
*c4a_8481033	4A	108.889
*c4a_45487006	4A	111.426
*c4a_46993874	4A	111.49
*c4a_47776531	4A	111.647
*c4a_49483050	4A	113.559
*c4a_46985430	4A	118.392
*c4a_46579386	4A	118.744
*c4a_49894067	4A	120.486
*c4a_49483166	4A	121.599
*c4a_49017243	4A	122.26
*c4a_47254034	4A	129.935
*c4a_47041052	4A	131.786
*c4a_45732917	4A	134.511
*c4b_49192896	4B	0
*c4b_47943147	4B	7.891
*c4b_47917023	4B	15.235
*c4b_46543235	4B	22.334
*c4b_47742432	4B	27.972
*c4b_47472736	4B	32.935
*c4b_43589334	4B	37.97
*c4b_44649426	4B	43.326
*c4b_37927806	4B	48.532
*c4b_39435084	4B	52.287
*c4b_47000532	4B	52.504
*c4b_37968732	4B	55.085
*c4b_37375696	4B	58.734
*c4b_37334382	4B	61.549
*c4b_40512089	4B	63.656
*c4b_42612228	4B	66.477
*c4b_9576815	4B	69.39
*c4b_36819117	4B	71.51
*c4b_9771491	4B	76.476
*c4b_24023487	4B	80.234
*c4b_10643004	4B	83.096
*c4b_9705252	4B	85.892
*c4b_9543693	4B	89.108
*c4b_9205873	4B	91.594
*c4b_9085413	4B	94.941
*c4b_7635825	4B	97.536
*c4b_6218185	4B	101.292
*c4b_4376922	4B	106.397
*c4b_9206444	4B	108.117
*c4b_2505740	4B	110.822
*c4b_2507160	4B	114.288
*c4b_4170710	4B	117.881
*c4b_2881475	4B	124.362
*c4b_2824726	4B	126.726
*c4b_3025431	4B	129.478
*c4b_739393	4B	131.301
*c4b_3261031	4B	131.304
*c4b_2821930	4B	132.907
*c4b_3025552	4B	137.176
*c4b_3261015	4B	137.969
*c4b_736789	4B	139.004
*c4b_441907	4B	141.572
*c4b_822761	4B	143.978
*c4b_3153015	4B	145.997
*c4b_466091	4B	146.701
*c4b_3509870	4B	147.864
*c4b_548459	4B	149.359
*c4b_3509881	4B	149.636
*c4b_920120	4B	149.825
*c4b_548525	4B	151.612
*c4b_2978115	4B	151.978
*c4b_422896	4B	153.316
*c4b_2977982	4B	153.977
*c4b_5938112	4B	154.696
*c4b_9157720	4B	155.151
*c4b_3192224	4B	155.256
*c4b_3809230	4B	155.832
*c4b_548291	4B	155.874
*c4b_4076302	4B	156.561
*c4b_3116840	4B	158.086
*c4b_613556	4B	158.635
*c4b_3809389	4B	159.488
*c4b_9613283	4B	161.056
*c4b_6233572	4B	164.832
*c4b_4267209	4B	165.765
*c4b_23411331	4B	166.632
*c4b_3963299	4B	167.034
*c4b_6135010	4B	167.823
*c4b_612714	4B	169.456
*c4b_11058796	4B	169.973
*c4b_35581751	4B	172.52
*c4b_11009590	4B	174.563
*c4b_5935552	4B	175.824
*c4b_8917530	4B	176.549
*c4b_6549113	4B	176.73
*c4b_10936429	4B	177.292
*c4b_50317158	4B	178.029
*c4b_9608638	4B	179.665
*c4b_10703398	4B	184.815
*c4b_18236576	4B	186.246
*c4b_2779492	4B	187.049
*c4b_50378261	4B	187.666
*c4b_20834700	4B	187.881
*c4b_18234332	4B	189.658
*c4b_24014246	4B	190.821
*c4b_24710019	4B	191.345
*c4b_20416931	4B	191.407
*c4b_27438399	4B	192.805
*c4b_37334976	4B	192.889
*c4b_36461979	4B	193.799
*c4b_50353281	4B	195.079
*c4b_30606142	4B	196.266
*c4b_50378421	4B	201.672
*c4b_18236211	4B	203.785
*c4b_24663214	4B	206.019
*c4b_37703924	4B	206.281
*c4b_24742413	4B	206.493
*c4b_17345413	4B	206.793
*c4b_50459463	4B	206.809
*c4b_50347939	4B	208.258
*c4b_48458867	4B	208.473
*c4b_50691895	4B	210.008
*c4b_15786072	4B	213.295
*c4b_44156777	4B	213.413
*c4b_49618508	4B	213.981
*c4b_9156286	4B	214.786
*c4b_42616350	4B	215.949
*c4b_50398077	4B	217.908
*c4b_37703886	4B	218.715
*c4b_49285361	4B	219.614
*c4b_37369552	4B	220.102
*c4b_47598278	4B	220.806
*c4b_47647343	4B	224.569
*c4b_37476702	4B	226.198
*c4b_40571553	4B	226.335
*c4b_47761081	4B	228.105
*c4b_46203820	4B	231.8
*c4b_46159880	4B	231.87
*c4b_47506612	4B	232.27
*c4b_44649028	4B	232.743
*c4b_42543270	4B	234.962
*c4b_46521494	4B	235.605
*c4b_47510487	4B	237.252
*c4b_46204226	4B	239.219
*c4b_46284491	4B	239.396
*c4b_46574255	4B	241.992
*c4b_47807024	4B	242.97
*c4b_46147762	4B	243.506
*c4b_43538828	4B	244.241
*c4b_43419767	4B	252.58
*c5a_63231883	5A	0
*c5a_63169709	5A	9.578
*c5a_51748624	5A	18.79
*c5a_61334088	5A	25.879
*c5a_42884141	5A	27.281
*c5a_63190294	5A	27.691
*c5a_12044918	5A	28.133
*c5a_63458326	5A	28.244
*c5a_63291030	5A	28.383
*c5a_63458284	5A	30.354
*c5a_58736074	5A	30.627
*c5a_59020999	5A	31.361
*c5a_42770956	5A	32.399
*c5a_61728698	5A	33.159
*c5a_62085571	5A	34.556
*c5a_63551458	5A	34.897
*c5a_12731790	5A	35.179
*c5a_61313221	5A	37.922
*c5a_42465267	5A	39.288
*c5a_58735889	5A	40.276
*c5a_43234035	5A	41.167
*c5a_16228840	5A	41.176
*c5a_61676856	5A	41.929
*c5a_61479633	5A	42.334
*c5a_58736149	5A	42.492
*c5a_61641680	5A	43.457
*c5a_43234197	5A	43.819
*c5a_60737996	5A	43.997
*c5a_61822837	5A	44.341
*c5a_61693840	5A	45.277
*c5a_43234145	5A	45.763
*c5a_63480485	5A	46.211
*c5a_61387546	5A	46.47
*c5a_61566415	5A	46.895
*c5a_9378516	5A	46.931
*c5a_61485131	5A	48.231
*c5a_61825563	5A	49.439
*c5a_61751442	5A	50.028
*c5a_61485247	5A	50.183
*c5a_37867845	5A	50.827
*c5a_62103865	5A	51.035
*c5a_62097509	5A	51.531
*c5a_61642294	5A	52.475
*c5a_49338870	5A	52.518
*c5a_5681737	5A	53.155
*c5a_54750865	5A	53.347
*c5a_20232263	5A	53.589
*c5a_61538193	5A	54.302
*c5a_62033964	5A	54.628
*c5a_37859376	5A	56.022
*c5a_57714262	5A	56.681
*c5a_63879728	5A	57.244
*c5a_51019701	5A	57.307
*c5a_57795013	5A	58.464
*c5a_57714256	5A	58.477
*c5a_62010426	5A	58.558
*c5a_37033926	5A	59.196
*c5a_5358450	5A	59.478
*c5a_58961603	5A	59.682
*c5a_58798144	5A	61.444
*c5a_3313082	5A	63.056
*c5a_58669009	5A	63.266
*c5a_14952285	5A	64.614
*c5a_59850193	5A	64.712
*c5a_54929492	5A	64.734
*c5a_59352228	5A	65.581
*c5a_3299402	5A	66.102
*c5a_59230740	5A	66.242
*c5a_59019517	5A	67.321
*c5a_54662111	5A	67.752
*c5a_58764394	5A	68.082
*c5a_63397054	5A	69.009
*c5a_3006678	5A	69.049
*c5a_59228619	5A	69.386
*c5a_56011681	5A	70.725
*c5a_56074865	5A	70.872
*c5a_54215481	5A	71.27
*c5a_3006469	5A	71.375
*c5a_58487539	5A	72.526
*c5a_28966828	5A	72.798
*c5a_60264051	5A	73.554
*c5a_54096316	5A	74.166
*c5a_51588166	5A	74.299
*c5a_59477569	5A	74.359
*c5a_50629389	5A	74.763
*c5a_59866915	5A	75.16
*c5a_2806069	5A	77.42
*c5a_59479094	5A	77.952
*c5a_36365365	5A	79.465
*c5a_54364969	5A	79.882
*c5a_2783020	5A	80.489
*c5a_52971383	5A	82.265
*c5a_58651765	5A	82.729
*c5a_63565374	5A	82.91
*c5a_51604157	5A	83.057
*c5a_59086321	5A	84.021
*c5a_53812049	5A	85.438
*c5a_50647912	5A	86.287
*c5a_51404312	5A	86.712
*c5a_52037699	5A	87.204
*c5a_2415611	5A	88.064
*c5a_51604461	5A	88.282
*c5a_55699579	5A	91.381
*c5a_51601046	5A	91.626
*c5a_36362790	5A	91.647
*c5a_48536046	5A	92.563
*c5a_51902638	5A	94.182
*c5a_52039139	5A	94.313
*c5a_59764175	5A	95.341
*c5a_2715754	5A	95.892
*c5a_51601576	5A	99.311
*c5a_44220123	5A	99.53
*c5a_2396322	5A	99.953
*c5a_54679529	5A	102.114
*c5a_44220483	5A	102.262
*c5a_42143681	5A	102.412
*c5a_44220053	5A	103.65
*c5a_53921437	5A	105.299
*c5a_44216434	5A	106.635
*c5a_45936852	5A	107.948
*c5a_43729415	5A	109.398
*c5a_43680378	5A	111.022
*c5a_43823742	5A	111.976
*c5a_44549807	5A	113.417
*c5a_1948795	5A	114.316
*c5a_26098597	5A	114.802
*c5a_13299442	5A	116.154
*c5a_53921374	5A	116.388
*c5a_28964748	5A	117.3
*c5a_44548666	5A	118.302
*c5a_13861701	5A	120.371
*c5a_43175327	5A	121.677
*c5a_25098072	5A	126.504
*c5a_13857923	5A	127.035
*c5a_3561939	5A	127.272
*c5a_37625888	5A	127.501
*c5a_39246673	5A	129.251
*c5a_37478203	5A	129.941
*c5a_13819003	5A	131.594
*c5a_43680436	5A	131.828
*c5a_26611568	5A	132.9
*c5a_2026388	5A	134.053
*c5a_29424163	5A	137.119
*c5a_3352157	5A	137.567
*c5a_15042939	5A	140.535
*c5a_9165315	5A	140.66
*c5a_2601216	5A	143.013
*c5a_15395958	5A	144.031
*c5a_38901927	5A	147.697
*c5a_12328356	5A	148.182
*c5a_15043480	5A	148.91
*c5a_2016908	5A	152.454
*c5a_10561141	5A	152.671
*c5a_15681770	5A	154.116
*c5a_749728	5A	154.666
*c5a_6139446	5A	155.763
*c5a_8191869	5A	155.843
*c5a_16084879	5A	157.654
*c5a_12437493	5A	159.4
*c5a_3615652	5A	160.036
*c5a_8191879	5A	161.561
*c5a_12159515	5A	163.322
*c5a_12337994	5A	163.4
*c5a_6243500	5A	166.395
*c5a_9150841	5A	167.556
*c5a_15120636	5A	168.095
*c5a_3505220	5A	171.051
*c5a_3662227	5A	171.479
*c5a_6139848	5A	173.015
*c5a_3277815	5A	177.824
*c5a_3598780	5A	178.776
*c5a_6136208	5A	179.862
*c5a_10674591	5A	180.189
*c5a_3258606	5A	186.3
*c5a_6242684	5A	187.653
*c5a_35774567	5A	187.789
*c5a_3599106	5A	191.297
*c5a_5588147	5A	191.498
*c5a_5354752	5A	193.79
*c5a_3299888	5A	198.333
*c5a_3642944	5A	203.323
*c5a_2683971	5A	216.337
*c5a_3234109	5A	216.721
*c5b_617937	5B	0
*c5b_3560137	5B	5.999
*c5b_659027	5B	7.658
*c5b_45557510	5B	11.639
*c5b_328117	5B	12.385
*c5b_659419	5B	14.265
*c5b_3515244	5B	19.354
*c5b_12437247	5B	19.85
*c5b_981486	5B	20.035
*c5b_28806521	5B	20.757
*c5b_4731274	5B	23.71
*c5b_1507378	5B	24.335
*c5b_38422605	5B	25.135
*c5b_658965	5B	25.413
*c5b_4276920	5B	27.921
*c5b_1081176	5B	30.69
*c5b_659708	5B	30.92
*c5b_4005688	5B	31.361
*c5b_9787885	5B	32.79
*c5b_49147428	5B	33.727
*c5b_3145501	5B	35.376
*c5b_7429373	5B	36.501
*c5b_9788531	5B	37.422
*c5b_37719922	5B	37.756
*c5b_4079751	5B	38.131
*c5b_11004897	5B	40.065
*c5b_13852291	5B	44.26
*c5b_37718980	5B	44.688
*c5b_4924367	5B	45.224
*c5b_11004952	5B	47.27
*c5b_9916345	5B	48.155
*c5b_11025111	5B	50.215
*c5b_17403983	5B	50.705
*c5b_42657859	5B	50.776
*c5b_58490766	5B	51.299
*c5b_8697943	5B	53.07
*c5b_8086046	5B	54.731
*c5b_10483701	5B	56.844
*c5b_8086072	5B	58.277
*c5b_15972248	5B	59.566
*c5b_58412758	5B	59.758
*c5b_8086376	5B	60.852
*c5b_20760794	5B	61.843
*c5b_8244885	5B	63.405
*c5b_14414614	5B	64.878
*c5b_57986775	5B	65.206
*c5b_9715929	5B	66.049
*c5b_13863603	5B	68.167
*c5b_15118192	5B	70.311
*c5b_16891364	5B	70.848
*c5b_57993570	5B	71.089
*c5b_16163812	5B	73.417
*c5b_25240689	5B	76.503
*c5b_64144720	5B	77.073
*c5b_20667870	5B	77.103
*c5b_20625690	5B	77.275
*c5b_14974595	5B	77.598
*c5b_75563859	5B	78.138
*c5b_43473294	5B	81.246
*c5b_15461474	5B	81.931
*c5b_46256296	5B	82.311
*c5b_75470503	5B	82.606
*c5b_32327026	5B	85.139
*c5b_25243372	5B	86.833
*c5b_75588535	5B	87.071
*c5b_9651738	5B	87.523
*c5b_17139954	5B	88.112
*c5b_37718537	5B	89.654
*c5b_75824245	5B	90.329
*c5b_7070318	5B	92.507
*c5b_45526742	5B	93.156
*c5b_35721357	5B	93.701
*c5b_75783055	5B	95.084
*c5b_35957438	5B	96.942
*c5b_42687892	5B	99.769
*c5b_71907045	5B	100.114
*c5b_36164086	5B	100.689
*c5b_28277603	5B	101.878
*c5b_69941655	5B	102.961
*c5b_71906761	5B	103.291
*c5b_75594176	5B	104.326
*c5b_38777892	5B	104.419
*c5b_39064436	5B	105.65
*c5b_37939675	5B	108.09
*c5b_37946173	5B	110.229
*c5b_70254976	5B	110.305
*c5b_53999904	5B	110.776
*c5b_71907430	5B	110.802
*c5b_35704498	5B	111.329
*c5b_75595374	5B	111.38
*c5b_42831602	5B	113.393
*c5b_31631173	5B	114.548
*c5b_37946488	5B	115.116
*c5b_61248641	5B	115.353
*c5b_66642543	5B	116.757
*c5b_32499759	5B	117.545
*c5b_33565607	5B	117.794
*c5b_33086860	5B	119.284
*c5b_33744017	5B	121.449
*c5b_32757500	5B	121.515
*c5b_33743980	5B	122.861
*c5b_33758412	5B	124.001
*c5b_42203555	5B	125.691
*c5b_61113629	5B	126.128
*c5b_58863780	5B	127.727
*c5b_61247252	5B	128.957
*c5b_33530082	5B	129.052
*c5b_64087459	5B	129.254
*c5b_58131052	5B	129.63
*c5b_57401538	5B	131.497
*c5b_33337816	5B	132.678
*c5b_67110834	5B	132.997
*c5b_61589557	5B	133.021
*c5b_57401792	5B	134.726
*c5b_29490657	5B	138.429
*c5b_61614638	5B	139.146
*c5b_33337999	5B	140.444
*c5b_70696124	5B	142.639
*c5b_57940602	5B	143.076
*c5b_71658350	5B	147.177
*c5b_70614622	5B	151.475
*c5b_71098491	5B	152.282
*c5b_67110012	5B	156.227
*c5b_71668963	5B	160.751
*c5b_69535272	5B	161.576
*c5b_71514101	5B	165.011
*c5b_71946817	5B	166.569
*c5b_69532892	5B	170.234
*c5b_71891790	5B	174.895
*c5b_71512341	5B	174.929
*c5b_74319947	5B	176.249
*c5b_71892178	5B	178.862
*c5b_75563973	5B	181.681
*c5b_71817649	5B	182.447
*c5b_71958492	5B	183.701
*c5b_71957856	5B	186.368
*c5b_71967588	5B	188.894
*c5b_75687981	5B	190.176
*c5b_75895635	5B	192.601
*c5b_75210591	5B	194.693
*c5b_75829787	5B	197.17
*c5b_75895584	5B	198.003
*c5b_75370735	5B	199.257
*c5b_75742627	5B	204.87
*c5b_75821964	5B	207.445
*c5b_74919720	5B	217.672
*c6a_1078775	6A	0
*c6a_37764430	6A	1.204
*c6a_3108491	6A	7.652
*c6a_138204	6A	12.61
*c6a_9309784	6A	15.814
*c6a_1074966	6A	17.988
*c6a_23773862	6A	19.099
*c6a_1074932	6A	20.625
*c6a_3001236	6A	23.544
*c6a_9435860	6A	25.738
*c6a_3376477	6A	26.389
*c6a_12470549	6A	26.956
*c6a_3371613	6A	27.581
*c6a_217858	6A	28.371
*c6a_3376539	6A	29.838
*c6a_9500287	6A	31.393
*c6a_3251783	6A	32.062
*c6a_9500341	6A	32.073
*c6a_34676578	6A	32.34
*c6a_3084251	6A	32.656
*c6a_3335628	6A	34.63
*c6a_22381796	6A	36.222
*c6a_9500179	6A	37.368
*c6a_2813677	6A	37.979
*c6a_1629944	6A	39.55
*c6a_35140629	6A	39.562
*c6a_706746	6A	40.821
*c6a_36565897	6A	41.17
*c6a_5662065	6A	41.39
*c6a_2920579	6A	41.849
*c6a_6458505	6A	43.181
*c6a_7364923	6A	43.517
*c6a_6456765	6A	45.304
*c6a_2811244	6A	45.379
*c6a_36890001	6A	46.011
*c6a_7528202	6A	46.188
*c6a_11352236	6A	46.647
*c6a_2843141	6A	46.845
*c6a_2816361	6A	47.77
*c6a_6458635	6A	48.262
*c6a_45504618	6A	48.512
*c6a_2579849	6A	49.586
*c6a_2842706	6A	50.242
*c6a_36565851	6A	51.424
*c6a_44578752	6A	51.843
*c6a_2907200	6A	52.32
*c6a_2816141	6A	53.218
*c6a_2675099	6A	53.261
*c6a_6556463	6A	54.355
*c6a_48935199	6A	54.541
*c6a_2842915	6A	54.555
*c6a_2838742	6A	55.508
*c6a_2815912	6A	56.113
*c6a_36531277	6A	57.53
*c6a_8945123	6A	58.077
*c6a_18204372	6A	58.175
*c6a_2814106	6A	59.015
*c6a_2843189	6A	60.214
*c6a_2815697	6A	62.697
*c6a_46240906	6A	62.891
*c6a_6451036	6A	63.984
*c6a_7109665	6A	64.175
*c6a_12590438	6A	64.706
*c6a_9606506	6A	64.708
*c6a_46240861	6A	65.986
*c6a_49715389	6A	66.113
*c6a_6703915	6A	66.487
*c6a_12590385	6A	67.687
*c6a_6497876	6A	67.999
*c6a_46239218	6A	70.42
*c6a_12421121	6A	70.945
*c6a_7400802	6A	71.018
*c6a_51609924	6A	71.784
*c6a_2815670	6A	72.223
*c6a_52042867	6A	72.442
*c6a_6941242	6A	73.207
*c6a_46239275	6A	73.797
*c6a_7400789	6A	74.691
*c6a_7677368	6A	75.095
*c6a_9133535	6A	75.362
*c6a_51609574	6A	76.372
*c6a_12386927	6A	76.811
*c6a_44353629	6A	77.063
*c6a_8051041	6A	79.723
*c6a_49288913	6A	80.464
*c6a_31941374	6A	80.501
*c6a_11661214	6A	80.981
*c6a_49288868	6A	84.174
*c6a_29664369	6A	84.759
*c6a_45731581	6A	87.887
*c6a_41895375	6A	90.999
*c6a_44927383	6A	91.174
*c6a_44731149	6A	91.498
*c6a_13394134	6A	92.509
*c6a_49286776	6A	92.75
*c6a_37746548	6A	92.84
*c6a_48207185	6A	93.172
*c6a_7458078	6A	94.251
*c6a_44578152	6A	95.204
*c6a_44043545	6A	95.264
*c6a_41942900	6A	97.384
*c6a_44756111	6A	97.832
*c6a_44756115	6A	98.108
*c6a_49589875	6A	98.932
*c6a_44582668	6A	100.359
*c6a_48207236	6A	101.521
*c6a_52556620	6A	101.546
*c6a_44468898	6A	102.161
*c6a_45647558	6A	103.843
*c6a_44453238	6A	106.201
*c6a_45591681	6A	109.258
*c6a_43381822	6A	114.384
*c6a_51989508	6A	116.39
*c6a_49193398	6A	118.121
*c6a_49346677	6A	120.665
*c6a_48760613	6A	124.498
*c6a_51988533	6A	125.836
*c6a_49195275	6A	126.417
*c6a_51865582	6A	131.617
*c6a_52589117	6A	133.433
*c6a_48760756	6A	134.086
*c6b_701782	6B	0
*c6b_701219	6B	11.886
*c6b_119963	6B	15.93
*c6b_687575	6B	16.887
*c6b_2883272	6B	21.488
*c6b_2971897	6B	22.277
*c6b_695151	6B	22.884
*c6b_700858	6B	25.985
*c6b_2814093	6B	28.018
*c6b_3229056	6B	32.719
*c6b_2785306	6B	34.427
*c6b_3211574	6B	34.459
*c6b_3448192	6B	36.819
*c6b_3211697	6B	41.096
*c6b_8375347	6B	42.098
*c6b_27053215	6B	45.771
*c6b_3561332	6B	46.084
*c6b_3764436	6B	48.035
*c6b_8409092	6B	50.06
*c6b_17870443	6B	50.603
*c6b_3561225	6B	51.498
*c6b_8783275	6B	54.066
*c6b_8411661	6B	56.316
*c6b_26218587	6B	57.666
*c6b_3561428	6B	60.336
*c6b_7007162	6B	60.755
*c6b_8783295	6B	65.011
*c6b_47052438	6B	65.437
*c6b_7008110	6B	66.504
*c6b_35745594	6B	67.305
*c6b_5273470	6B	67.358
*c6b_47006268	6B	69.69
*c6b_20112532	6B	70.132
*c6b_8331819	6B	72.732
*c6b_19647413	6B	73.17
*c6b_39814816	6B	73.728
*c6b_26378202	6B	74.475
*c6b_19544128	6B	77.788
*c6b_22221244	6B	79.423
*c6b_32058988	6B	81.224
*c6b_29689580	6B	83.918
*c6b_38155202	6B	85.193
*c6b_32058921	6B	85.872
*c6b_28116840	6B	87.072
*c6b_44335370	6B	87.467
*c6b_30777131	6B	90.41
*c6b_29125105	6B	90.606
*c6b_43237533	6B	90.924
*c6b_55471465	6B	91.618
*c6b_45784842	6B	92.582
*c6b_44204750	6B	92.7
*c6b_32074943	6B	95.991
*c6b_42602547	6B	96.691
*c6b_44204435	6B	100.42
*c6b_26218370	6B	100.626
*c6b_47698023	6B	103.697
*c6b_49045374	6B	104.608
*c6b_43462025	6B	105.162
*c6b_42410977	6B	105.407
*c6b_47754837	6B	106.758
*c6b_49099646	6B	107.466
*c6b_49045283	6B	109.049
*c6b_47842743	6B	109.158
*c6b_15246576	6B	112.379
*c6b_14950911	6B	112.966
*c6b_15080709	6B	115.229
*c6b_15022087	6B	115.542
*c6b_48722335	6B	115.706
*c6b_55625961	6B	119.855
*c6b_49788328	6B	120.609
*c6b_48751256	6B	121.008
*c6b_49289292	6B	121.341
*c6b_53749009	6B	123.076
*c6b_56090304	6B	123.215
*c6b_48476439	6B	124.185
*c6b_55552809	6B	125.561
*c6b_55442652	6B	128.028
*c6b_55623494	6B	128.181
*c6b_55396845	6B	128.277
*c6b_53349575	6B	132.172
*c6b_55396850	6B	132.173
*c6b_47953354	6B	132.618
*c6b_55764919	6B	135.053
*c6b_55287659	6B	136.061
*c6b_48903907	6B	140.571
*c6b_55630164	6B	142.317
*c6b_54982500	6B	143.102
*c6b_55679731	6B	143.281
*c6b_54495712	6B	144.891
*c6b_48903756	6B	146.536
*c6b_54321443	6B	153.879
*c7a_47604099	7A	0
*c7a_26914373	7A	7.13
*c7a_3829490	7A	11.934
*c7a_3991790	7A	15.944
*c7a_6293365	7A	16.037
*c7a_3403251	7A	16.067
*c7a_37997237	7A	16.957
*c7a_3829506	7A	18.587
*c7a_35500555	7A	19.117
*c7a_3164871	7A	20.644
*c7a_1385281	7A	23.058
*c7a_4406871	7A	23.505
*c7a_3867236	7A	23.59
*c7a_6086928	7A	23.658
*c7a_5831427	7A	24.437
*c7a_1579389	7A	26.044
*c7a_2832941	7A	27.607
*c7a_12389889	7A	28.525
*c7a_3825840	7A	28.593
*c7a_25133135	7A	28.845
*c7a_1498783	7A	29.124
*c7a_3165532	7A	30.19
*c7a_4916518	7A	30.693
*c7a_3966825	7A	31.111
*c7a_24641432	7A	31.464
*c7a_1500066	7A	31.787
*c7a_24641431	7A	32.658
*c7a_3534205	7A	32.864
*c7a_3011123	7A	33.658
*c7a_4522575	7A	33.714
*c7a_8268774	7A	35.217
*c7a_4410944	7A	36.171
*c7a_3893719	7A	36.366
*c7a_2975351	7A	38.625
*c7a_5653737	7A	39.981
*c7a_5972159	7A	40.033
*c7a_11741385	7A	40.494
*c7a_24976636	7A	40.791
*c7a_4947451	7A	41.334
*c7a_4947473	7A	42.826
*c7a_5357467	7A	43.126
*c7a_8958662	7A	43.157
*c7a_9226796	7A	44.198
*c7a_4372034	7A	44.364
*c7a_3154729	7A	45.415
*c7a_5580251	7A	46.326
*c7a_2258058	7A	46.712
*c7a_3532769	7A	47.219
*c7a_5001718	7A	47.236
*c7a_8290034	7A	47.332
*c7a_8701463	7A	48.554
*c7a_8904620	7A	49.84
*c7a_5660537	7A	50.549
*c7a_2651820	7A	50.786
*c7a_5077651	7A	51.813
*c7a_7961851	7A	51.934
*c7a_16442521	7A	52.409
*c7a_6786648	7A	52.982
*c7a_8841615	7A	53.43
*c7a_38539430	7A	53.68
*c7a_8743907	7A	54.323
*c7a_6786680	7A	54.568
*c7a_24332117	7A	54.69
*c7a_24018456	7A	55.032
*c7a_4349686	7A	55.649
*c7a_5017785	7A	55.751
*c7a_25099091	7A	55.915
*c7a_24018451	7A	57.164
*c7a_38539447	7A	57.309
*c7a_8707967	7A	58.671
*c7a_1510261	7A	58.71
*c7a_9161258	7A	58.953
*c7a_5186301	7A	59.758
*c7a_8819054	7A	60.75
*c7a_10663771	7A	62.063
*c7a_4917471	7A	63.248
*c7a_8758326	7A	63.598
*c7a_7962009	7A	64.177
*c7a_9103821	7A	64.823
*c7a_22264020	7A	65.375
*c7a_5077821	7A	66.198
*c7a_12694176	7A	66.391
*c7a_23639836	7A	66.808
*c7a_5135730	7A	67.786
*c7a_9103785	7A	68.038
*c7a_8206670	7A	68.298
*c7a_23337859	7A	69.416
*c7a_6956581	7A	69.925
*c7a_8422837	7A	70.658
*c7a_10814898	7A	71.088
*c7a_21708658	7A	71.48
*c7a_10083312	7A	72.098
*c7a_12857173	7A	72.844
*c7a_5135692	7A	73.186
*c7a_2615880	7A	74.111
*c7a_8408079	7A	74.404
*c7a_17754822	7A	74.544
*c7a_12401263	7A	75.689
*c7a_16816770	7A	78.852
*c7a_18456350	7A	80.292
*c7a_19377124	7A	80.588
*c7a_10270983	7A	81.085
*c7a_18142418	7A	81.421
*c7a_21821164	7A	81.611
*c7a_19167470	7A	82.815
*c7a_19325700	7A	83.307
*c7a_10663687	7A	84.002
*c7a_7872200	7A	84.492
*c7a_18407518	7A	84.571
*c7a_17908688	7A	85.444
*c7a_24576260	7A	86.154
*c7a_19325608	7A	86.274
*c7a_14496204	7A	87.821
*c7a_18456207	7A	88.282
*c7a_21074792	7A	88.817
*c7a_18212222	7A	89.109
*c7a_17032976	7A	89.18
*c7a_19325645	7A	89.676
*c7a_9330204	7A	91.526
*c7a_19325743	7A	92.372
*c7a_18456087	7A	93.074
*c7a_15290252	7A	93.435
*c7a_18144214	7A	93.88
*c7a_18302136	7A	94.296
*c7a_21524967	7A	96.022
*c7a_10083158	7A	96.46
*c7a_18575151	7A	97.39
*c7a_18260836	7A	98.527
*c7a_18212119	7A	98.571
*c7a_18212123	7A	100.31
*c7a_26511407	7A	101.737
*c7a_10270872	7A	101.99
*c7a_18260788	7A	102.391
*c7a_21842947	7A	103.663
*c7a_18456275	7A	104.581
*c7a_34961087	7A	108.418
*c7a_18488155	7A	110.57
*c7a_10271008	7A	111.133
*c7a_19315381	7A	111.833
*c7a_8936543	7A	112.653
*c7a_16773064	7A	112.695
*c7a_43215265	7A	115.342
*c7a_25011236	7A	118.756
*c7a_21864078	7A	120.338
*c7a_40679085	7A	121.158
*c7a_14141194	7A	126.05
*c7a_53402308	7A	126.684
*c7a_16945698	7A	127.276
*c7a_51627266	7A	134.341
*c7a_10334788	7A	140.383
*c7a_5007502	7A	144.609
*c7a_14565477	7A	161.375
*c7b_800040	7B	0
*c7b_1808450	7B	1.422
*c7b_4945252	7B	3.579
*c7b_1044888	7B	4.922
*c7b_3214481	7B	8.173
*c7b_14199049	7B	9.504
*c7b_1435762	7B	11.427
*c7b_3423073	7B	12.172
*c7b_4438780	7B	13.5
*c7b_345266	7B	15.331
*c7b_2768611	7B	19.993
*c7b_4658401	7B	20.596
*c7b_12078030	7B	22.238
*c7b_14115920	7B	23.16
*c7b_1897740	7B	25.679
*c7b_4808097	7B	27.01
*c7b_15640234	7B	30.54
*c7b_12052754	7B	31.14
*c7b_314090	7B	32.172
*c7b_17408929	7B	32.247
*c7b_5370365	7B	32.265
*c7b_1980230	7B	33.621
*c7b_1401568	7B	34.242
*c7b_2094164	7B	34.72
*c7b_15640188	7B	34.786
*c7b_14115861	7B	36.697
*c7b_12040606	7B	36.784
*c7b_8079929	7B	39.001
*c7b_16616678	7B	39.097
*c7b_345287	7B	40.99
*c7b_8080482	7B	41.782
*c7b_17250208	7B	43.392
*c7b_13245623	7B	43.883
*c7b_4032798	7B	44.967
*c7b_11268032	7B	45.297
*c7b_15591860	7B	45.299
*c7b_4065988	7B	46.661
*c7b_987527	7B	46.786
*c7b_17213104	7B	47.954
*c7b_18646766	7B	48.721
*c7b_9248041	7B	49.81
*c7b_1657299	7B	49.829
*c7b_17216669	7B	50.924
*c7b_17551578	7B	50.953
*c7b_17216615	7B	53.497
*c7b_5178304	7B	53.821
*c7b_271031	7B	54.499
*c7b_21313605	7B	55.524
*c7b_20514851	7B	55.938
*c7b_9056525	7B	58.75
*c7b_21284425	7B	59.375
*c7b_13406289	7B	60.686
*c7b_14328568	7B	61.094
*c7b_20588371	7B	61.338
*c7b_21663268	7B	64.963
*c7b_21833986	7B	65.785
*c7b_21480820	7B	65.914
*c7b_5256054	7B	67.802
*c7b_23166207	7B	68.047
*c7b_41480353	7B	69.647
*c7b_21480834	7B	69.959
*c7b_21527718	7B	73.596
*c7b_46326742	7B	74.443
*c7b_42684427	7B	75.797
*c7b_8197910	7B	78.13
*c7b_29490371	7B	78.99
*c7b_23221308	7B	79.341
*c7b_43099416	7B	82.459
*c7b_29493451	7B	84.138
*c7b_43155675	7B	84.611
*c7b_43593772	7B	88.576
*c7b_43135498	7B	90.332
*c7b_22308955	7B	90.826
*c7b_29496177	7B	90.892
*c7b_29465905	7B	91.047
*c7b_46238235	7B	92.985
*c7b_29541119	7B	94.349
*c7b_48751067	7B	94.677
*c7b_46247269	7B	96.034
*c7b_42751101	7B	96.372
[truncated: 686 more rows]

## Sheet: Chromosome name v1.1 vs. v4-5.1
Chromosome name v1.1	Chromosome name v4.1 and 5.1
1A	1N
1B	1K
2A	2N
2B	2K
3A	3K
3B	3N
4A	4K
4B	4N
5A	5K
5B	5N
6A	6K
6B	6N
7A	7K
7B	7N
8A	8N
8B	8K
9A	9N
9B	9K
