# Supplementary material for: Identification of QTL Associated with Regrowth Vigor Using the Nested Association Mapping Population in Switchgrass
Source: Plants (Basel). 2022 Feb 21;11(4):566. doi: 10.3390/plants11040566 (PMC8874488; doi:10.3390/plants11040566)
Supplement: Supplementary file 1 [file plants-11-00566-s001.zip › Table S3_Localization of candidate genes using v5.1 reference map.xlsx]

## Sheet: Sheet1
Table S3. Localization of identified candidate genes using v5.1 reference map
QTL	Nearest SNP (v1.1)	v1.1: Switchgrass Gene ID	v5.1: Switchgrass Gene Synonym	v5.1: Chromosome	v5.1: Gene Location	Gene Symbol	Gene description
QRV.kn17.1B	c1b_53443735	Pavir.Ab03140	Pavir.1KG529800.3	1K	NC_053136.1 (54136330 - 54139925)	LOC120644526	Serine/arginine-rich splicing factor RSZ21A-like
QRV.kn17.5A˗1	c5a_61728698	Pavir.Ea03896	Pavir.5KG742800.1	5K	NC_053140.1 (59695729 - 59701449)	LOC120709114	Phosphoribosylformylglycinamidine synthase
QRV.kn17.5A˗2	c5a_9165315	Pavir.Ea00667	Pavir.5KG119000.1	5K	NC_053140.1 (8872434 - 8873116)	LOC120706133	Bowman-Birk type wound-induced proteinase inhibitor WIP1
QRV.kn17.5A˗3	c5a_15120636	Pavir.Ea01103	Pavir.5KG183200.1	5K	NC_053140.1 (14076604 - 14081218)	LOC120706517	Probable indole˗3˗pyruvate monooxygenase YUCCA10
QRV.kn17.6B	c6b_20112532	Pavir.Fb00888	Pavir.6NG194100.4	6N	NC_053150.1 (17670486 - 17673673)	LOC120679161	AUGMIN subunit 1
QRV.kn17.7B	c7b_17213104	Pavir.Gb01265	Pavir.7NG349600.1	7N	NC_053151.1 (36676976 - 36686154)	LOC120682920	Protein ECERIFERUM 1
QRV.kn18.5A	c5a_15120636	Pavir.Ea01103	Pavir.5KG183200.1	5K	NC_053140.1 (14076604 - 14081218)	LOC120706517	Probable indole˗3˗pyruvate monooxygenase YUCCA10
QRV.kn18.5B	c5b_71514101	Pavir.Eb03680	Pavir.5NG584300.1	5N	NC_053149.1 (63407731 - 63410948)	LOC120672491	Scarecrow-like protein 9
QRV.kn18.6B	c6b_3764436	Pavir.Fb01562	Pavir.6KG256200.1	6K	NC_053141.1 (36151308 - 36159772)	LOC120712392	F-box protein SKIP28
QRV.kn18.8A	c8a_14434016	Pavir.Ha00587	Pavir.8NG253100.1	8N	NC_053152.1 (32663498 - 32672625)	LOC120685555	SUMO-activating enzyme subunit 1A
