# Supplementary figures and images for: Identification of QTL Associated with Regrowth Vigor Using the Nested Association Mapping Population in Switchgrass
Source: MDPI journal article supplement (doi:10.3390/plants11040566), 2022-02-21

Figure S1. Linkage map comprising 2684 single nucleotide polymorphism (SNP) markers.

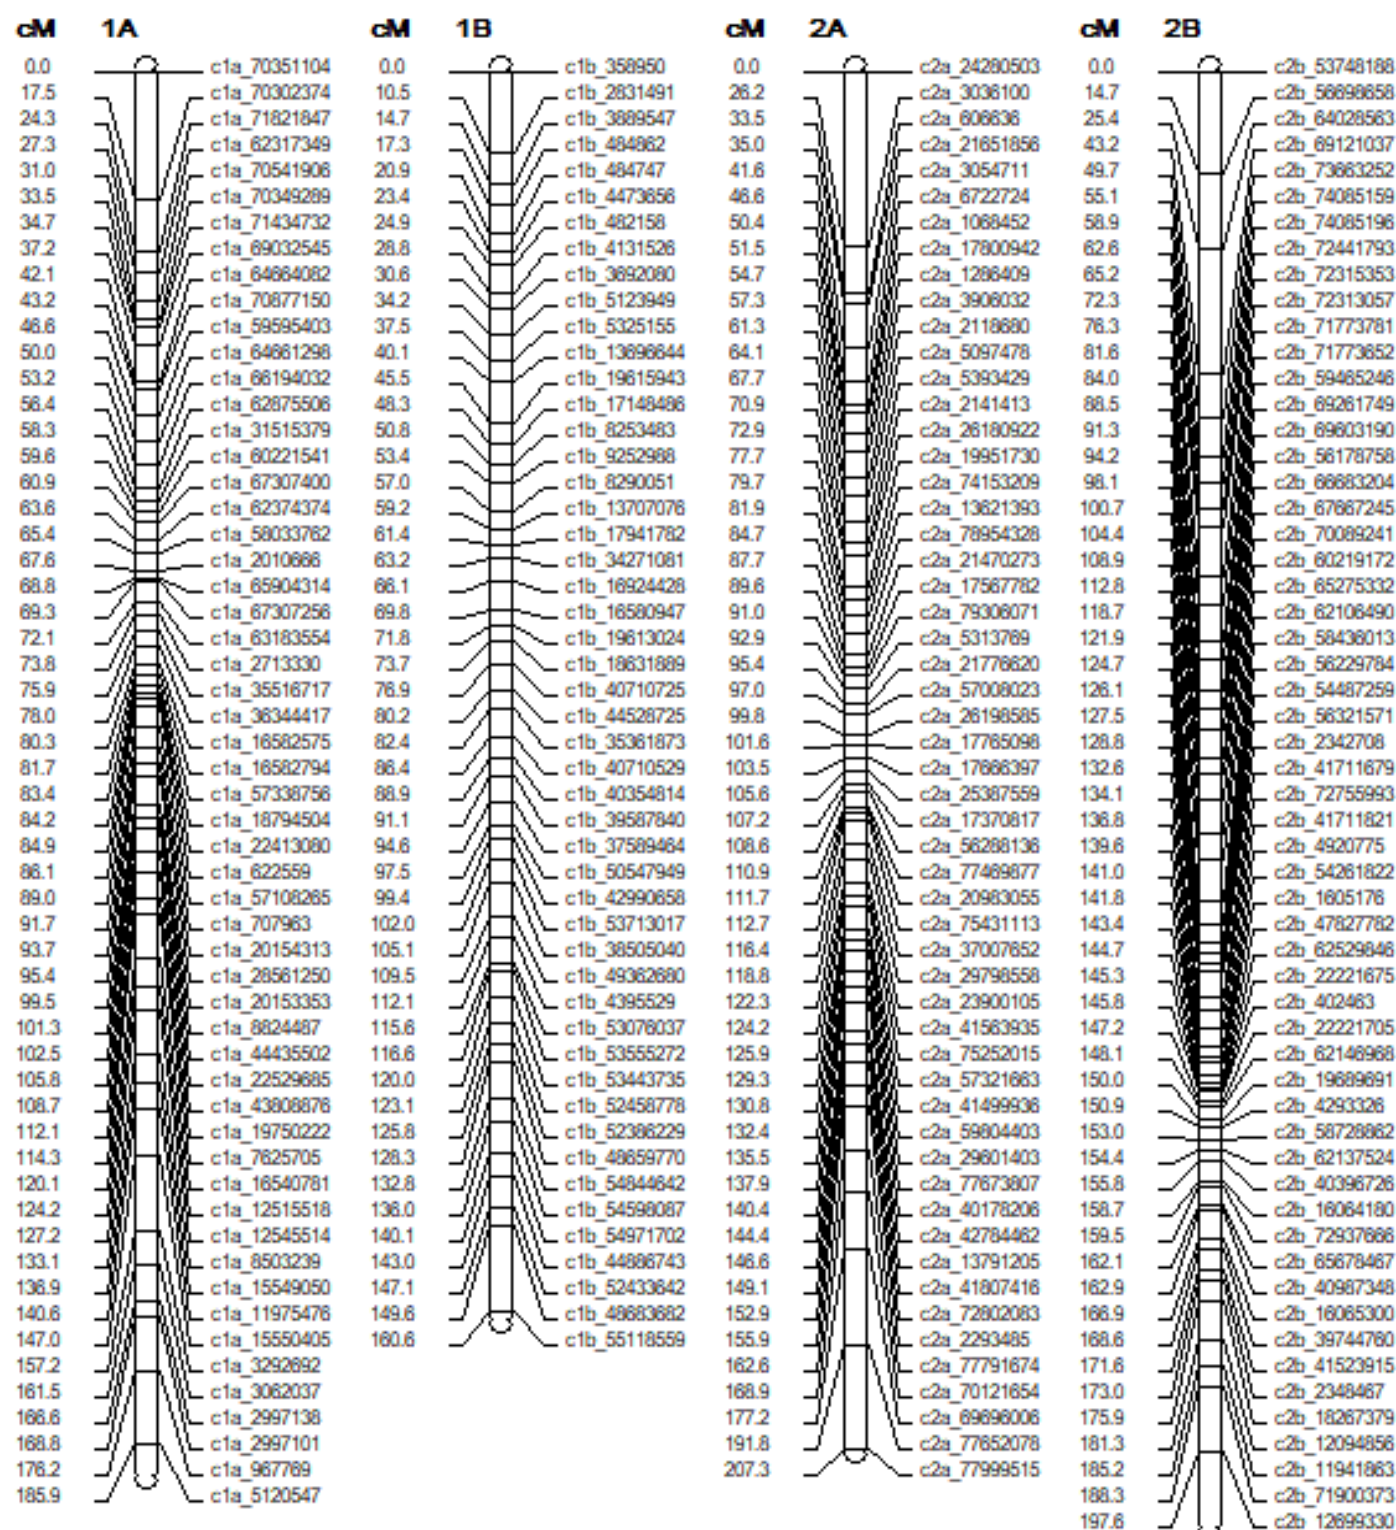

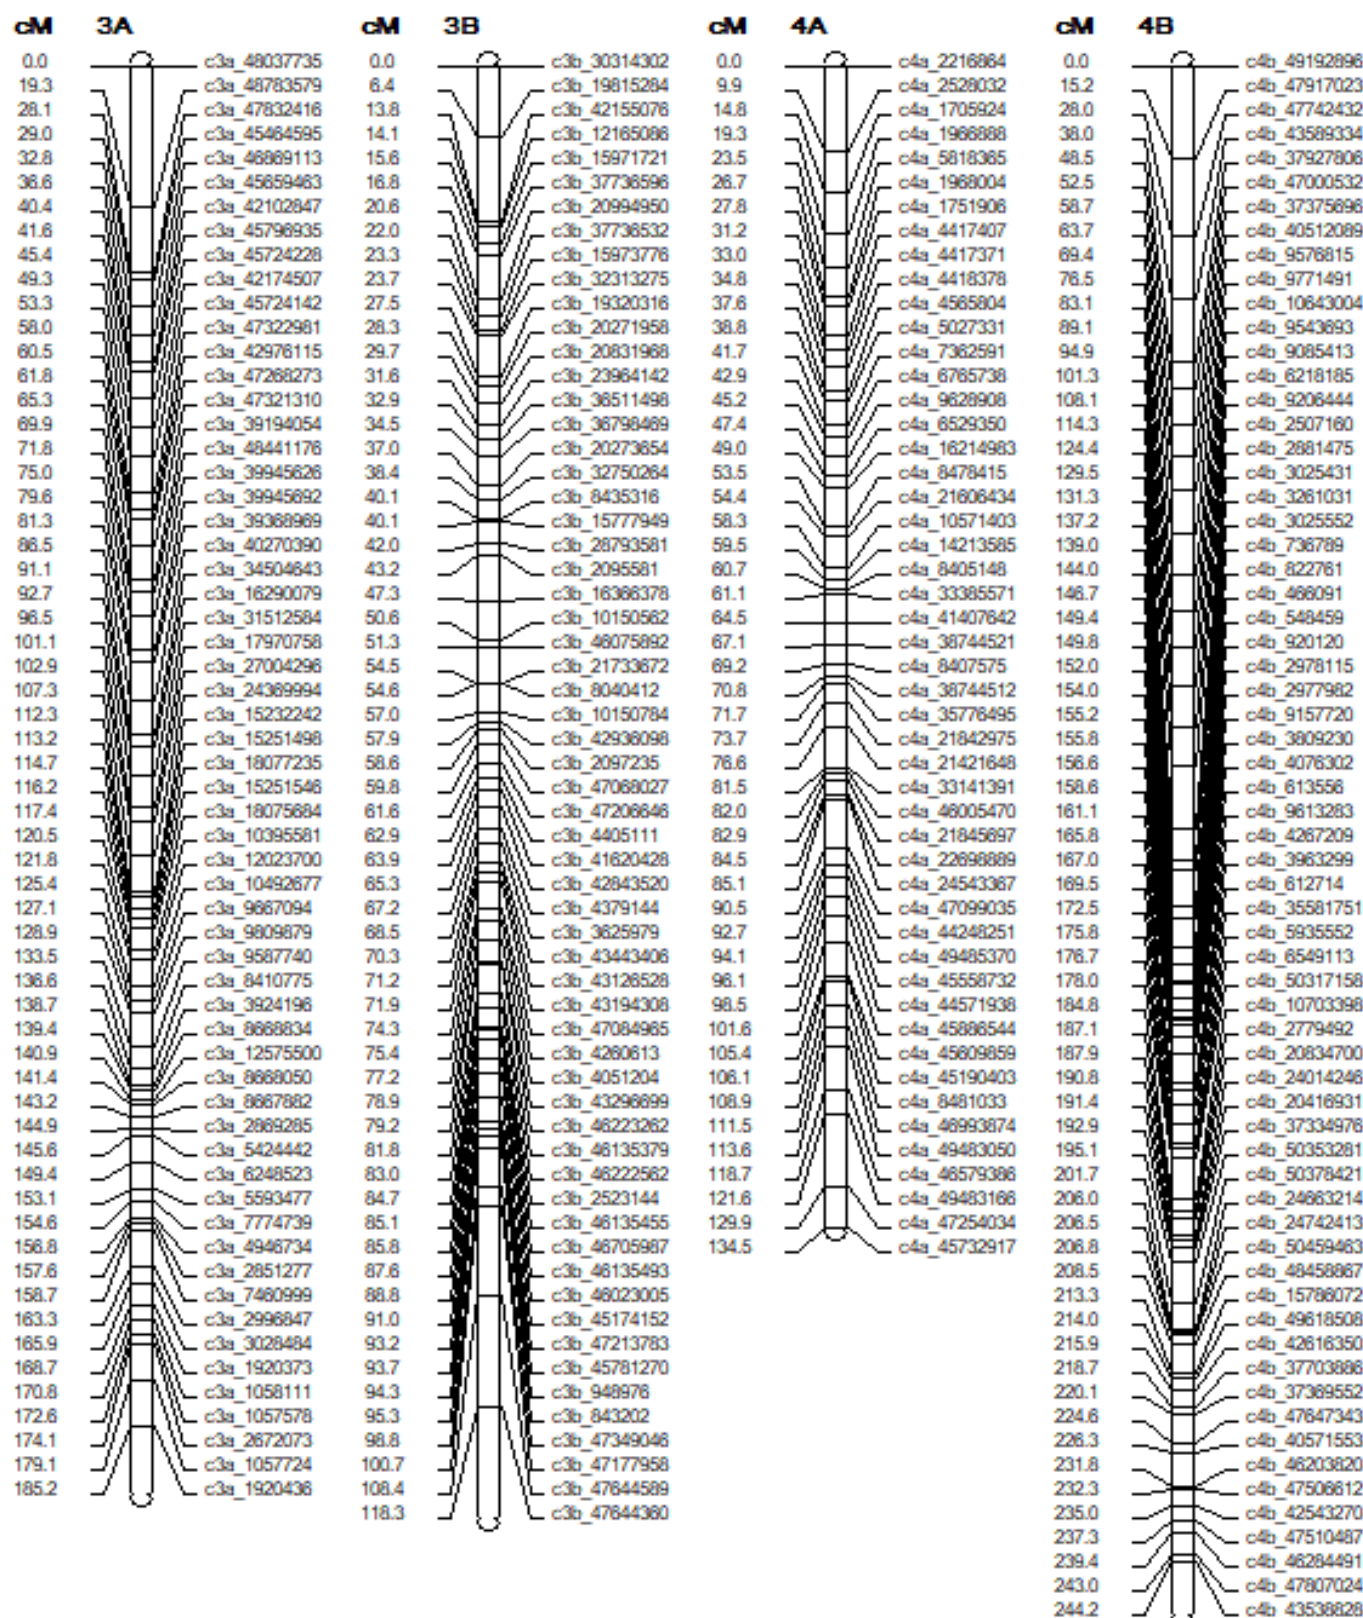



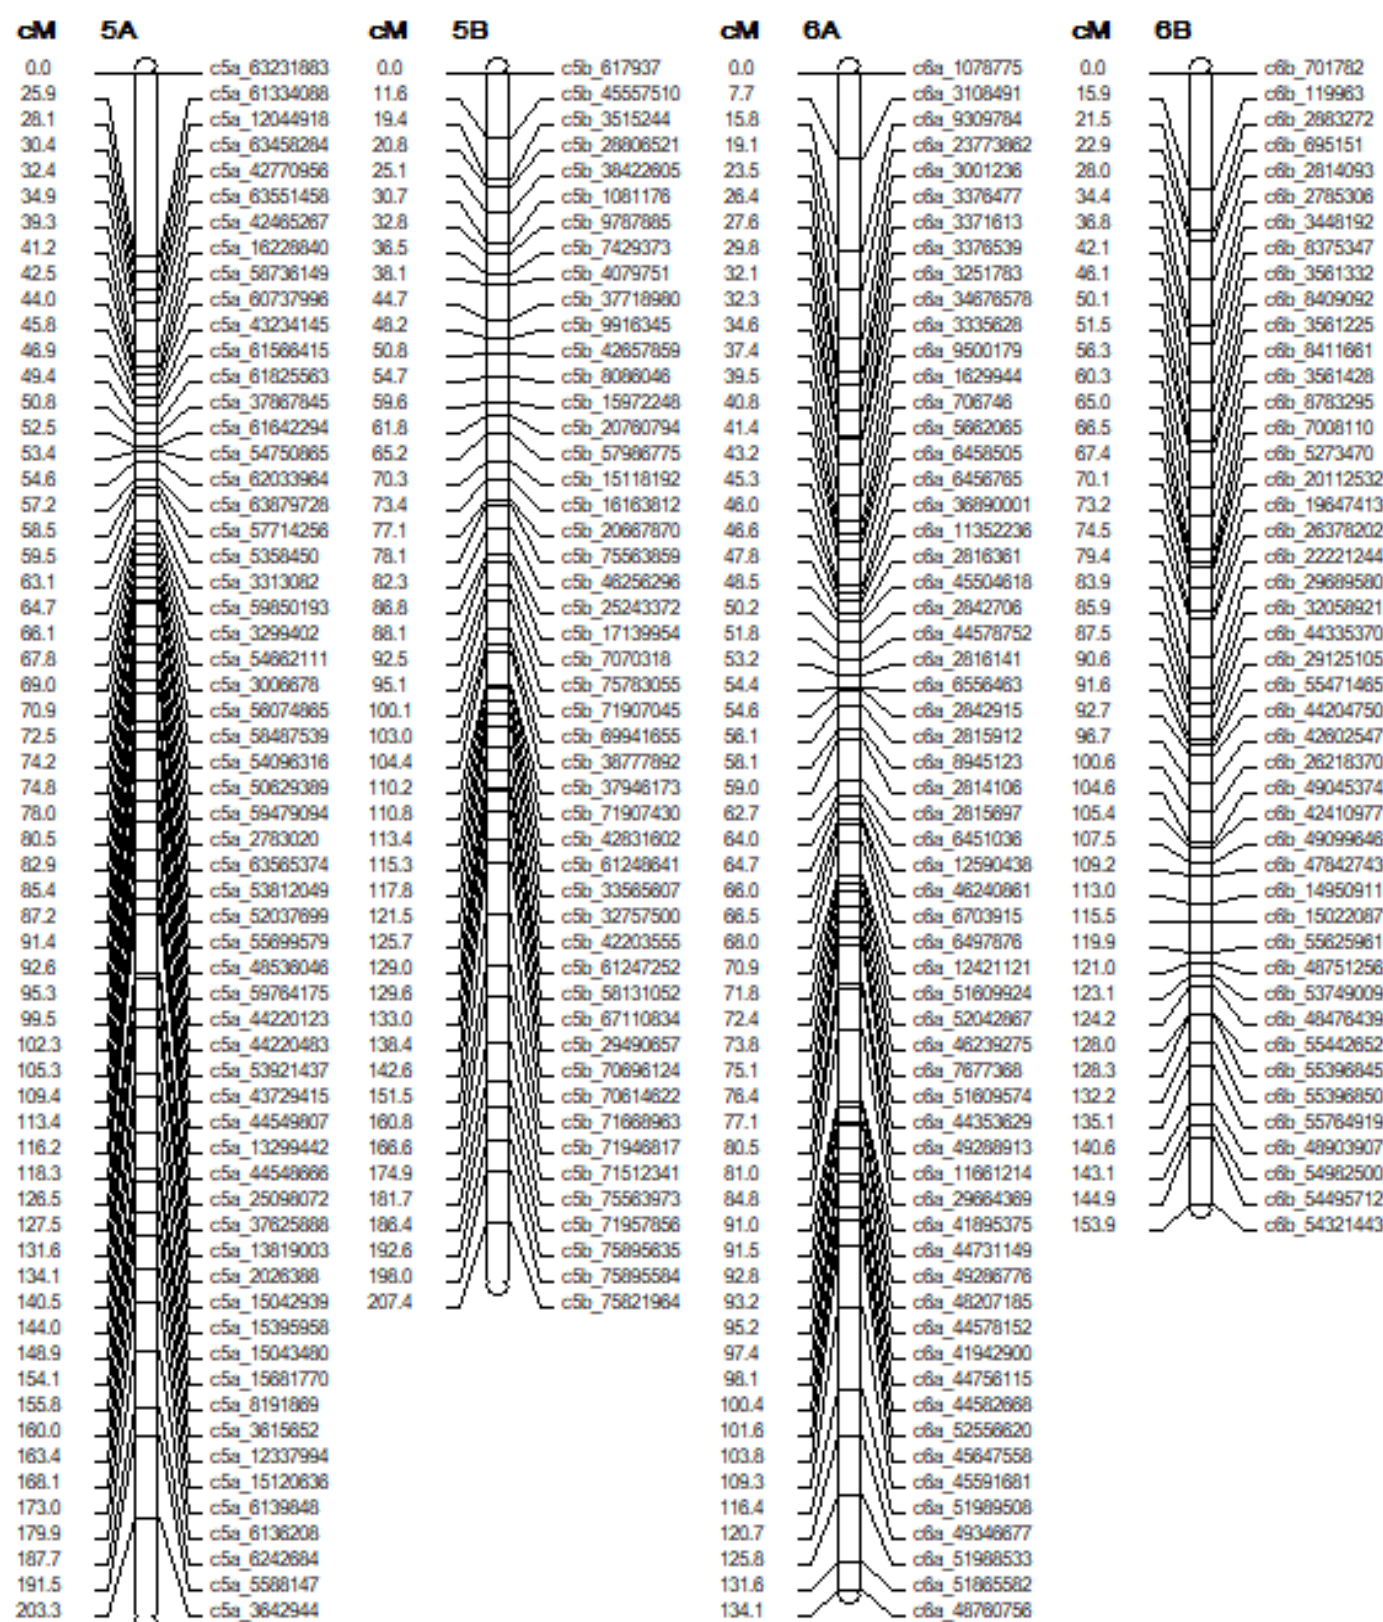

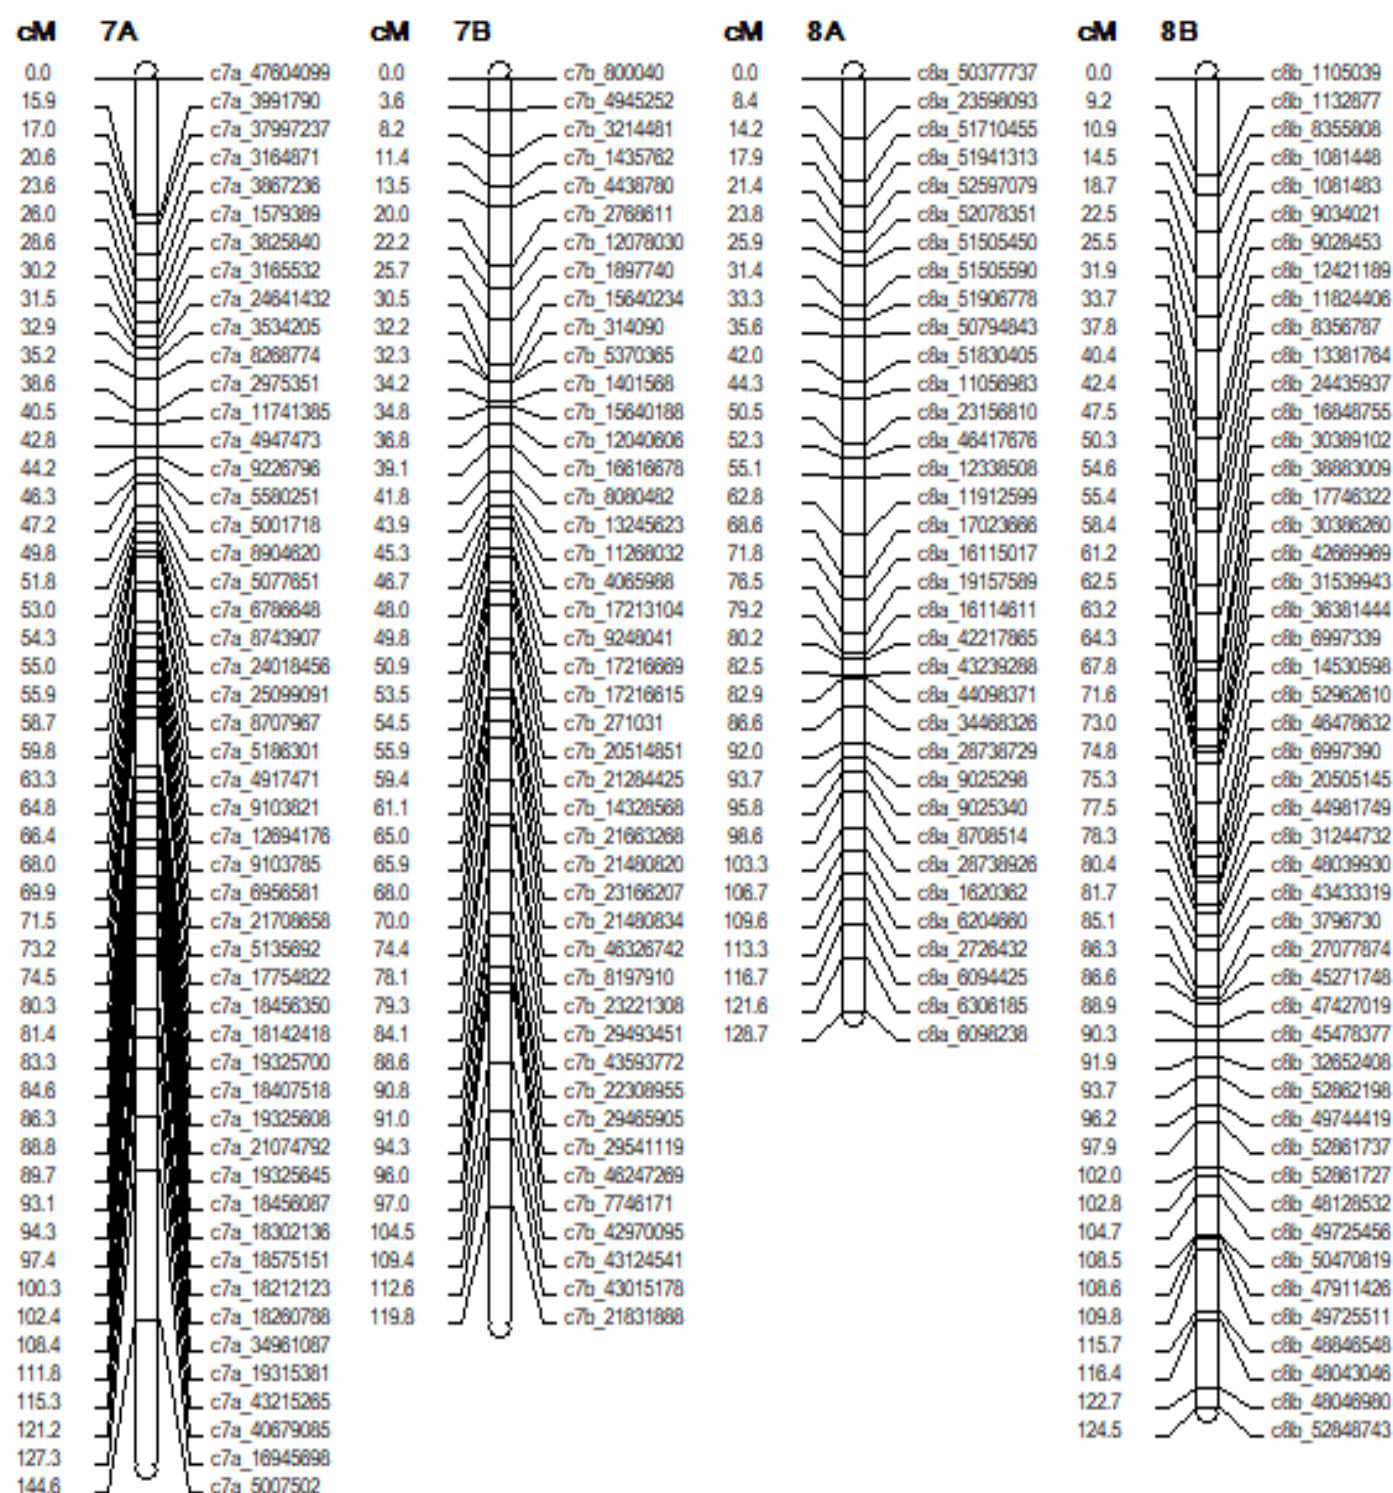



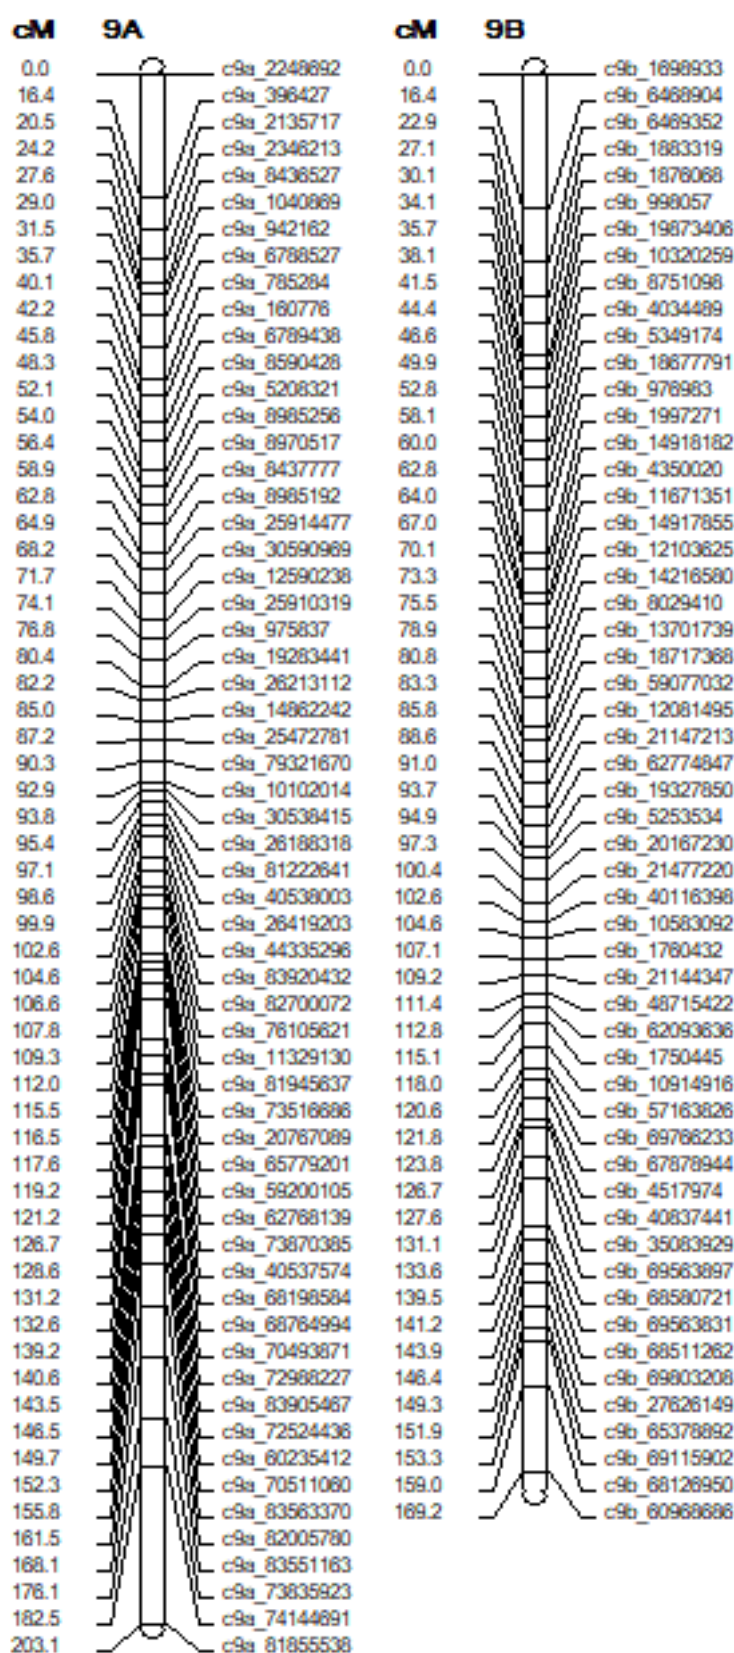

Supplement: s1 [file s1]
